# Supplementary material for: Deglacial and Holocene sea ice and climate dynamics at the Western Antarctic Peninsula
Source: Copernicus journal article supplement (doi:10.5194/egusphere-2022-804), 2022-08-24
Supplement: Supplementary file 1 [file egusphere-2022-804-supplement-version2.pdf]

## Supplements

### Section 1: Radiocarbon dating

Table S1: **RO**verview of radiocarbon **dat**ing data including sample name and number, material, conventional age plus error, the modelled age for correction, ventilation age, corrected age and final calibrated ages with error. Due to the lack of planktic foraminiferas, we base the age model of core PS97/072-1 on benthic AMS  $^{14}\text{C}$  dates obtained from shell fragments and benthic foraminiferas tests. This is usually done without problems on shallow shelves (< 400 m) where the benthos lives in a mixed layer - or in areas where **one already has nearby paired** benthic-planktic AMS  $^{14}\text{C}$  ages pairs from which one knows they provide a  $^{14}\text{C}$  ventilation age for bottom waters that can be subtracted in addition to surface reservoir ages in the calibration routine and can transfer it for dating at nearby sites. To account for the relatively deep water depth (ca. 2000 m) at core site PS97/072-1, we added a ventilation age of 1200 years to the surface reservoir age to estimate account for the additional age of the deep water masses relative to the surface waters. This is needed as the model of Butzin et al. (2017) we use here only accounts for a reservoir age of the upper water masses between 0 - 300 m. No close-by benthic-planktic foraminifer radiocarbon pairs exist to constrain our estimated ventilation age of 1200 years, to the best of our knowledge. However, earlier comparisons of dated benthic calcareous material with AIOM-derived  $^{14}\text{C}$  ages, which had been in turn compared to planktic foraminifer ages in various locations at the Antarctic Peninsula (Domack et al., 2001; Barcena et al., 2006; Heroy et al., 2008), as well as  $^{14}\text{C}$  ages of deep-water corals from nearby Drake Passage, independently dated by U/Th (Burke and Robinson, 2012), indicate radiocarbon ventilation ages between ca. 1100-1400 years as acceptable approach. For the calibration of the (reservoir and ventilation age corrected)  $^{14}\text{C}$  dates, we used the IntCal20 curve as this calibration does not automatically subtract "time-varying" marine reservoir ages as the new Marine20 curve. This allowed us to subtract the reservoir and ventilation ages individually based on our assumptions.

| Sample depth [cmbsf] | Sample Name        | AWI-No.  | Material            | Conventional $^{14}\text{C}$ age [a BP] | Error conv. $^{14}\text{C}$ age [a] | Modelled age for correction after Butzin et al. (2017) [a] | Ventilation age for correction [a] | Corrected $^{14}\text{C}$ age for calibration [a BP] | Calibrated age [cal. a BP] | Error of calibrated age 1 sigma [a] | Error of calibrated age 2 sigma [a] |
|----------------------|--------------------|----------|---------------------|-----------------------------------------|-------------------------------------|------------------------------------------------------------|------------------------------------|------------------------------------------------------|----------------------------|-------------------------------------|-------------------------------------|
| 190                  | PS97/072-1_190cm   | 1428.1.1 | shell fragments     | 5076                                    | 118                                 | 1076                                                       | 1200                               | 2800                                                 | 2920                       | 140                                 | 300                                 |
| 212                  | PS97/072-1_212cm   | 2744.1.1 | shell fragments     | 5246                                    | 82                                  | 1107                                                       | 1200                               | 2939                                                 | 3090                       | 120                                 | 230                                 |
| 312                  | PS97/072-1_312cm   | 1429.2.1 | shell fragments     | 6054                                    | 118                                 | 1083                                                       | 1200                               | 3771                                                 | 4170                       | 190                                 | 340                                 |
| 340                  | PS97/072-1_340cm   | 1430.1.1 | shell fragments     | 6156                                    | 52                                  | 1089                                                       | 1200                               | 3867                                                 | 4300                       | 110                                 | 160                                 |
| 451.5                | PS97/072-1_451.5cm | 1431.1.1 | shell fragments     | 7081                                    | 52                                  | 1142                                                       | 1200                               | 4739                                                 | 5410                       | 80                                  | 130                                 |
| 464                  | PS97/072-1_464cm   | 1432.2.1 | shell fragments     | 7329                                    | 117                                 | 1157                                                       | 1200                               | 4972                                                 | 5740                       | 150                                 | 260                                 |
| 866.5                | PS97/072-1_866.5cm | 7405.1.1 | benthic foraminifer | 12865                                   | 101                                 | 1599                                                       | 1200                               | 10066                                                | 11610                      | 210                                 | 330                                 |
| 868.5                | PS97/072-1_868.5cm | 7406.1.1 | benthic foraminifer | 12983                                   | 100                                 | 1571                                                       | 1200                               | 10212                                                | 12040                      | 390                                 | 530                                 |

### Section 2: Matching piston core PS97/072-1 and short core PS97/072-2

We matched the top of piston core PS97/072-1 with the short core PS97/072-2 from the same sample site (and from the same cruise) using TOC and biogenic opal data (Fig. S1). An age model for the short core was already developed based on  $^{210}\text{Pb}$  dating (Vorrath et al., 2020). By overlapping the TOC and biogenic opal records we note that the top of the piston core likely matches the short core at a depth of 25 cm, which corresponds to the calendar year 1902 in the common era. Therefore, we have set the age of the core top of PS97/072-1 to 0.05 ka BP.

Formatiert: Nummerierung: Fortlaufend

Formatiert

Formatiert: Schriftart: 7,5 Pt.

Formatiert

Formatiert: Schriftart: (Standard) Times New Roman, 7,5 Pt., Englisch (Vereinigtes Königreich)

Formatierte Tabelle

Formatiert: Schriftart: 7,5 Pt.

Formatiert: Schriftart: 7,5 Pt.

Formatiert: Schriftart: 7,5 Pt.

Formatiert: Schriftart: (Standard) Times New Roman, 7,5 Pt., Englisch (Vereinigtes Königreich)

Formatiert: Zeilenabstand: Mehrere 1,15 ze

Formatiert

Formatiert: Schriftart: 7,5 Pt.

Formatiert: Schriftart: 7,5 Pt.

Formatiert: Schriftart: 7,5 Pt., Nicht Hervorheben

Formatiert

Formatiert: Schriftart: 7,5 Pt.

Formatiert: Schriftart: 7,5 Pt., Nicht Hervorheben

Formatiert

Formatiert: Schriftart: 7,5 Pt.

Formatiert: Schriftart: 7,5 Pt., Nicht Hervorheben

Formatiert

Formatiert: Schriftart: 7,5 Pt.

Formatiert: Schriftart: 7,5 Pt., Nicht Hervorheben

Formatiert

Formatiert: Schriftart: 7,5 Pt.

Formatiert: Schriftart: 7,5 Pt., Nicht Hervorheben

Formatiert

Formatiert: Schriftart: 7,5 Pt.

Formatiert: Schriftart: 7,5 Pt., Nicht Hervorheben

Formatiert

Formatiert: Schriftart: 7,5 Pt.

Formatiert: Schriftart: 7,5 Pt., Nicht Hervorheben

Formatiert

Formatiert: Schriftart: 7,5 Pt.

Formatiert: Schriftart: 7,5 Pt., Nicht Hervorheben

Formatiert

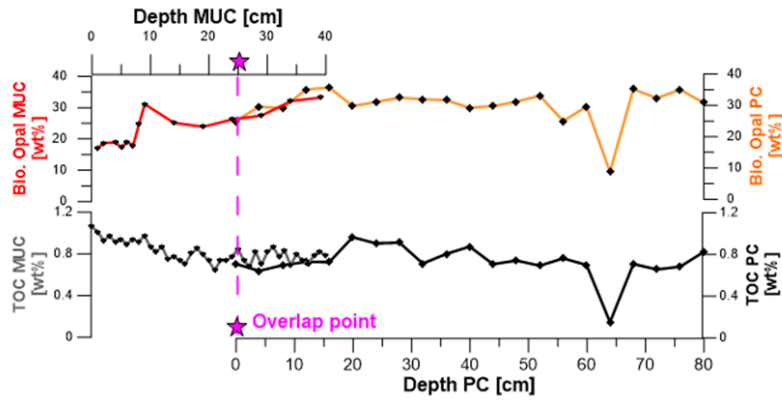

33  
34 Figure S2: Overlap point of the short sediment core PS97/072-2 (MUC) and piston core PS97/072-1 (PC) based  
35 on total organic carbon and biogenic opal (wt%). Data from the short core from Vorrath et al. (2020).  
36  
37  
38

39 **Section 3:** Taxonomic list of diatoms identified in the sediments of core PS97/072-1 organized by groups  
40 according to their habitat (Armand et al., 2005; Cárdenas et al., 2019; Crosta et al., 2005; Esper et al., 2010; Esper  
41 and Gersonde, 2014a, 2014b; Gersonde and Zielinski, 2000; Romero et al., 2005; Zielinski and Gersonde, 1997).  
42

43 **Benthic and epiphytic diatoms:**

- 44 *Achnanthes brevipes* Agardh  
45 *Amphora copulata* (Kützing) Kützing  
46 *A. coffaeiformis* (Agardh) Kützing  
47 *Cocconeis costata* Gregory  
48 *C. dalmanii* Al-Handal, Riaux-Gobin, Romero & Wulff  
49 *C. fasciolata* (Ehrenberg) Brown  
50 *C. californica* var. *californica* Grunow  
51 *C. californica* var. *keruelensis* Heiden  
52 *C. melchioroides* Al-Handal, Riaux-Gobin, Romero & Wulff  
53 *C. imperatrix* Schmidt  
54 *C. schuettii* Van Heurck  
55 *Cocconeis* spp.  
56 *Entopyla ocellata* (Arnott) Grunow  
57 *Fallacia marnieri* (Manguin) Witkowski, Lange-Bertalot & Metzeltin  
58 *Gomphonemopsis littoralis* (Hendey) Medlin  
59 *Grammatophora angulosa* Ehrenberg  
60 *Licmophora gracilis* (Kützing) Peragallo  
61 *Melosira adeliae* Manguin  
62 *Navicula directa* (Smith) Ralfs  
63 *N. glaciei* Van Heurck  
64 *N. imperfecta* Cleve  
65 *N. perminuta* Grunow  
66 *Paralia sulcata* (Ehrenberg) Cleve  
67 *Planothidium vicentii* Manguin  
68 *Pseudogomphonema kantschaticum* (Grunow) Medlin  
69

70 **Diatoms reflecting seasonal sea-ice (temperature range between -1.8 and 0°C):**

- 71 *Actinochilus* (Ehrenberg) Simonsen  
72 *Berkeleya adeliensis* Medlin  
73 *B. antarctica* Grunow  
74 *B. rutilans* (Trentepohl) Grunow  
75 *Corethron pennatum* (Grunow) Ostenfeld  
76 *Eucampia antarctica* var. *recta* Mangin  
77 *Fragilariopsis curta* (Van Heurck) Hustedt  
78 *F. cylindrus* (Grunow) Krieger  
79 *F. nana* (Stemann Nielsen) Paasche  
80 *F. obliquecostata* (Van Heurck) Heiden  
81 *F. peragallii* (Hasle) Cremer  
82 *F. rhombica* (O'Meara) Hustedt  
83 *F. ritscheri* Hustedt  
84 *F. sublinearis* (Van Heurck) Heiden & Kolbe  
85 *F. vanheurckii* (Peragallo) Hustedt  
86 *Neodenticula seminae* (Simonsen & T.Kanaya) Akiba & Yanagisawa  
87 *Nitzschia hybrida* Grunow  
88 *N. stellata* Manguin  
89 *N. taeniformis* Simonsen  
90 *Odontella weissflogii* (Janisch) Grunow  
91 *Porosira glacialis* (Grunow) Jørgensen  
92 *P. pseudodenticulata* (Hustedt) Jousé  
93 *Stellarima microtrias* (Ehrenberg) Hasle & Sims  
94 *Synedropsis laevis* (Heiden) Hasle, Medlin & Syvertsen  
95 *S. recta* Hasle, Syvertsen & Medlin  
96 *Synedropsis* sp.  
97 *Thalassiosira antarctica* (T1) Comber

98  
99 **Diatoms associated with cold open ocean conditions (temperature range between 1 and 4°C):**

- 100 *Asteromphalus hookeri* Ehrenberg  
101 *A. hyalinus* Karsten  
102 *Eucampia antarctica* var. *antarctica* Mangin  
103 *Fragilariopsis pseudonana* (Hasle) Hasle  
104 *F. separanda* Hustedt  
105 *Proboscia alata* (Brightwell) Sundström  
106 *P. inermis* (Castracane) Hordan & Ligowski  
107 *Proboscia* sp.  
108 *Pseudo-nitzschia turgiduloides* Hasle  
109 *Rhizosolenia antennata* f. *antennata* Sundström  
110 *R. antennata* f. *semispina* Sundström  
111 *R. polydactyla* f. *polydactyla* Castracane  
112 *R. simplex* Karsten  
113 *Shionodiscus frenguelliopsis* (Fryxell & Johansen) Alverson, Kang & Theriot  
114 *S. gracilis* var. *expectus* (VanLandingham) Alverson, Kang & Theriot  
115 *S. gracilis* var. *gracilis* (Karsten) Alverson, Kang & Theriot  
116 *Thalassiosira antarctica* (T2) Comber  
117 *T. grvida* Cleve  
118 *T. lentiginosa* (Janisch) Fryxell  
119 *T. maculata* Fryxell & Johansen  
120 *T. oliverana* Priddle & Fryxell  
121 *T. ritscheri* (Hustedt) Hasle  
122 *T. scotia* Fryxell & Hoban  
123 *T. tumida* (Janisch) Hasle

124 *Thalassiothrix antarctica* Schimper ex Karsten  
125 *Trichotoxon reinboldii* (Van Heurck) Reid & Round

126  
127 **Diatoms associated with warmer open ocean conditions (temperature range between 4 and 14°C):**

128 *Azpeitia tabularis* (Grunow) Fryxell & Sims  
129 *Coscinodiscus oculus-iridis* (Ehrenberg) Ehrenberg  
130 *Fragilariopsis kerguelensis* (O'Meara) Hustedt  
131 *Nitzschia bicapitata* Cleve  
132 *Shionodiscus oestrupii* (Ostenfeld) Alverson, Kang & Theriot  
133 *Stephanopyxis turris* Greville & Arnott

134  
135 **Reworked species:**

136 *Actinocyclus ingens* Rattray  
137 *Cladogramma* sp. Lohmann  
138 *Rouxia constricta* Zielinski & Gersonde  
139 *R. leventerae* Bohaty, Scherer & Harwood

140  
141  
142  
143  
144  
145  
146  
147  
148  
149  
150  
151  
152  
153  
154  
155  
156  
157  
158  
159  
160  
161  
162  
163  
164  
165  
166  
167  
168  
169  
170  
171  
172  
173  
174  
175  
176  
177

178 **Section 4: Terrigenous input, stable isotopes of TOC and IPSO<sub>25</sub>, and total diatom and CRS content**

179 The BIT indices below 0.05 and the mean molar C/N ratio below 8.5 indicate a marine origin of the organic matter  
180 and that the input of terrigenous organic matter did not affect the composition of GDGTs. Maximum BIT values  
181 of up to 0.05 between 13.5 ka and 12.0 ka BP may evidence an additional input of soil-derived GDGTs in response  
182 to glacier activity. However, these values are distinctly lower than the 0.3 threshold signaling enhanced input of  
183 terrigenous organic matter and since also the C/N values do not point to higher input of terrestrial material during  
184 this time interval, we conclude that the GDGT paleothermometry was not affected by soil-derived GDGTs.

185 Organic carbon stable isotope ratios ( $\delta^{13}\text{C}$ ) range between -22.2 and -25.5‰, while the stable carbon isotope  
186 composition of IPSO<sub>25</sub> varies between -15.1‰ and -19.5‰ supporting its origin from sea ice algae (Massé et al.,  
187 2011; Sinninghe Damsté et al., 2007). Also shown are total diatom concentrations (without *Chaetoceros* resting  
188 spores) and percentage of *Chaetoceros* resting spores in comparison to biogenic opal and TOC content.  
189

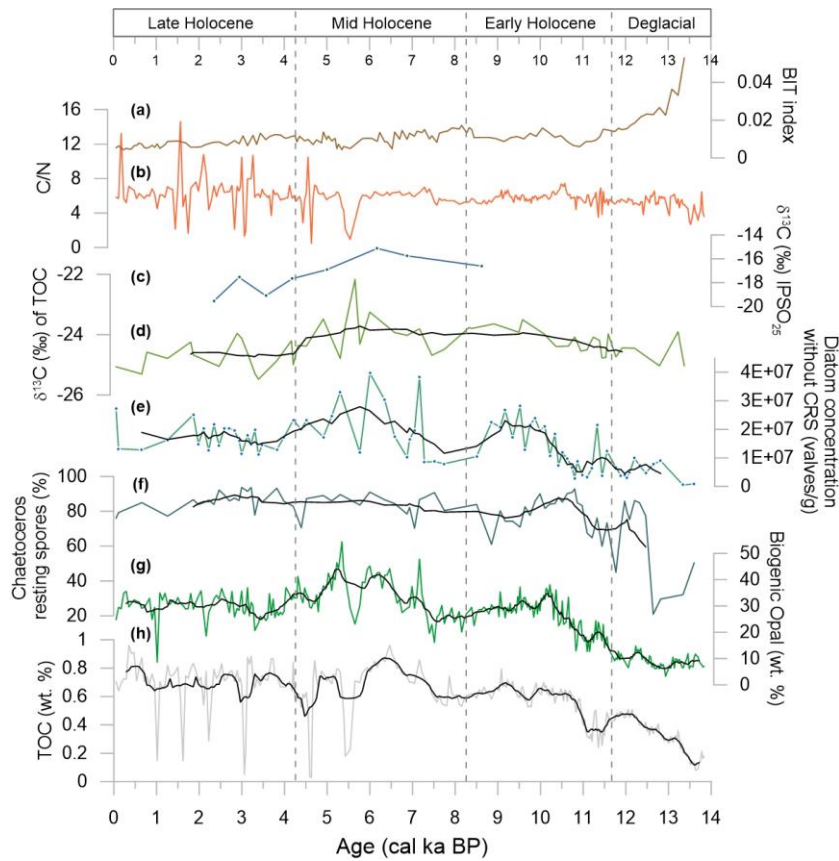

190  
191  
192 **Figure S4: The Comparison of biomarkers and selected diatom count data with stable carbon isotope composition**  
193 **of organic material** a) BIT index, b) C/N values, c)  $\delta^{13}\text{C}$  of IPSO<sub>25</sub>, d)  $\delta^{13}\text{C}$  of TOC, e) total diatom concentration,  
194 f) *Chaetoceros* resting spores, g) biogenic opal content, and h) TOC content of PS97/072-1.  
195

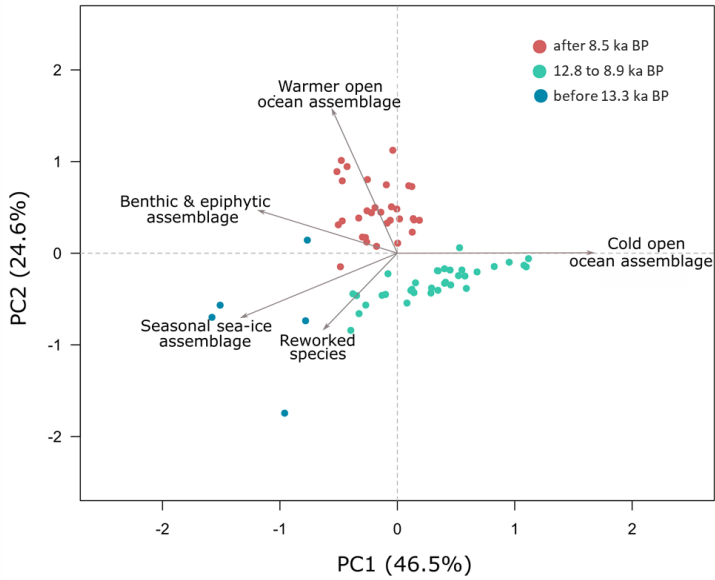

197  
198 Figure S5: The Spearman principal component analysis (PCA) biplot shows the relationship between the five  
199 diatom assemblages indicative for a warmer open and colder open ocean, seasonal sea-ice, benthic/epiphytic,  
200 and reworked diatoms in core PS97/072-1. PC1 represents 46.5% and PC2 24.6% of the variance. Before 13.3 ka BP  
201 seasonal sea-ice diatoms are common, between 12.8 ka and 8.9 ka BP assemblages of a colder open ocean are  
202 dominant whereas a warmer open ocean is indicated by diatom assemblages from 8.5 ka BP until today.  
203  
204  
205

206 **Section 6: Details on principal component analysis**  
 207 Diatom assemblages, and ages scores of Principal Component Analysis (PCA), eigenvalues and percentage of  
 208 variance explained from figure S5. The diatom assemblages ~~are listed in the~~ [can be found in the online resource](https://doi.pangaea.de/10.1594/PANGAEA.952279)  
 209  [\(https://doi.pangaea.de/10.1594/PANGAEA.952279\)](https://doi.pangaea.de/10.1594/PANGAEA.952279), table S7.  
 210

| Importance of components                   |                 |        |        |        |        |        |
|--------------------------------------------|-----------------|--------|--------|--------|--------|--------|
|                                            |                 | PC1    | PC2    | PC3    | PC4    | PC5    |
| <b>Eigenvalue</b>                          |                 | 2.326  | 1.236  | 0.928  | 0.491  | 0.018  |
| <b>Proportion explained</b>                |                 | 0.465  | 0.247  | 0.186  | 0.098  | 0.004  |
| <b>Cumulative proportion of variance</b>   |                 | 0.465  | 0.713  | 0.898  | 0.996  | 1      |
| Species scores                             |                 |        |        |        |        |        |
| Assemblages                                |                 | PC1    | PC2    | PC3    | PC4    | PC5    |
| <b>Benthic and epiphytic</b>               |                 | -1.375 | 0.600  | -0.558 | 1.034  | 0.017  |
| <b>Seasonal sea ice</b>                    |                 | -1.560 | -0.722 | 0.799  | -0.114 | 0.164  |
| <b>Open ocean cold</b>                     |                 | 1.837  | 0.061  | -0.338 | 0.326  | 0.184  |
| <b>Open ocean warm</b>                     |                 | -0.592 | 1.668  | -0.255 | -0.655 | 0.073  |
| <b>Reworked species</b>                    |                 | -0.633 | -0.908 | -1.497 | -0.408 | 0.027  |
| Scores (weight sums of assemblages scores) |                 |        |        |        |        |        |
| Depth in core (cm)                         | Age [ka cal BP] | PC1    | PC2    | PC3    | PC4    | PC5    |
| 4                                          | 0.111           | -0.178 | 0.455  | -0.361 | 1.108  | 0.262  |
| 40                                         | 0.657           | -0.184 | 0.499  | -0.541 | 1.664  | 0.061  |
| 80                                         | 1.265           | -0.257 | 0.171  | 0.138  | 0.001  | -0.175 |
| 120                                        | 1.872           | 0.022  | 0.096  | 0.176  | -0.396 | -0.055 |
| 128                                        | 1.994           | 0.082  | 0.354  | -0.156 | 0.075  | -1.231 |
| 136                                        | 2.115           | 0.135  | 0.732  | -0.345 | -0.054 | 0.264  |
| 144                                        | 2.237           | -0.339 | 0.374  | 0.035  | 0.042  | -0.377 |
| 152                                        | 2.358           | -0.451 | 0.368  | 0.004  | 0.410  | 0.624  |
| 160                                        | 2.480           | -0.020 | 0.351  | 0.000  | -0.236 | 0.228  |
| 168                                        | 2.601           | -0.010 | 0.498  | -0.062 | -0.343 | 0.285  |
| 176                                        | 2.723           | 0.056  | 0.370  | -0.141 | 0.123  | 0.229  |
| 184                                        | 2.844           | -0.430 | 0.792  | -0.327 | 0.580  | -0.375 |
| 192                                        | 2.950           | 0.210  | 0.357  | -0.219 | 0.191  | 0.117  |
| 200                                        | 3.009           | -0.493 | -0.166 | 0.479  | -0.163 | -0.628 |
| 216                                        | 3.139           | -0.477 | 0.310  | 0.012  | 0.528  | 0.294  |
| 224                                        | 3.223           | -0.049 | 0.317  | -0.062 | -0.343 | 0.450  |
| 232                                        | 3.307           | -0.206 | 0.804  | -0.362 | 0.351  | -0.164 |
| 240                                        | 3.392           | -0.078 | 0.464  | -0.359 | 0.943  | 0.551  |
| 248                                        | 3.476           | -0.224 | 0.128  | -0.108 | 0.562  | 0.248  |
| 280                                        | 3.814           | -0.458 | 0.890  | -0.212 | 0.035  | 0.425  |
| 360                                        | 4.511           | -0.268 | 0.610  | 0.015  | -0.474 | 0.312  |
| 400                                        | 4.935           | -0.303 | 0.559  | -0.059 | -0.037 | 0.296  |
| 440                                        | 5.359           | 0.268  | 0.272  | 0.123  | -0.984 | -0.143 |
| 480                                        | 5.973           | -0.391 | 0.904  | 0.282  | -1.910 | 0.435  |

| Scores (weight sums of assemblages scores) |                 |        |        |        |        |        |
|--------------------------------------------|-----------------|--------|--------|--------|--------|--------|
| Depth in core (cm)                         | Age [ka cal BP] | PC1    | PC2    | PC3    | PC4    | PC5    |
| 520                                        | 6.557           | 0.151  | 0.214  | 0.085  | -0.503 | 0.270  |
| 540                                        | 6.849           | 0.042  | 0.472  | -0.062 | -0.382 | 0.081  |
| 568                                        | 7.258           | 0.000  | 1.095  | -0.200 | -1.254 | -0.795 |
| 584                                        | 7.491           | -0.418 | 0.998  | -0.137 | -0.558 | 0.197  |
| 600                                        | 7.725           | -0.050 | 0.745  | -0.236 | -0.252 | -0.578 |
| 652                                        | 8.484           | -0.133 | 0.082  | -0.047 | 0.671  | -0.407 |
| 676                                        | 8.834           | 0.627  | -0.212 | -0.067 | 0.145  | -1.488 |
| 690                                        | 9.039           | 0.364  | -0.201 | 0.111  | -0.054 | -0.437 |
| 710                                        | 9.331           | 0.565  | -0.249 | 0.017  | 0.134  | 0.298  |
| 730                                        | 9.622           | 0.311  | -0.443 | 0.269  | 0.041  | 0.383  |
| 738                                        | 9.739           | 0.067  | -0.402 | 0.245  | 0.325  | -1.010 |
| 746                                        | 9.856           | 0.159  | -0.437 | 0.290  | 0.179  | 0.258  |
| 754                                        | 9.973           | -0.095 | -0.460 | 0.424  | 0.110  | -0.121 |
| 762                                        | 10.090          | 0.172  | -0.334 | 0.281  | -0.047 | 0.156  |
| 770                                        | 10.206          | 0.580  | -0.256 | 0.079  | -0.129 | -0.106 |
| 778                                        | 10.323          | -0.330 | -0.469 | 0.499  | 0.281  | 0.851  |
| 784                                        | 10.411          | -0.314 | -0.575 | 0.505  | -0.104 | -0.271 |
| 790                                        | 10.498          | -0.396 | -0.685 | 0.835  | -0.453 | -0.440 |
| 798                                        | 10.615          | -0.394 | -0.863 | 0.995  | -0.597 | 0.322  |
| 806                                        | 10.732          | 0.100  | -0.554 | 0.467  | -0.113 | 0.335  |
| 810                                        | 10.790          | 0.486  | -0.349 | 0.116  | 0.107  | 0.175  |
| 814                                        | 10.849          | 0.316  | -0.380 | 0.173  | 0.249  | 0.447  |
| 822                                        | 10.965          | 0.056  | -0.420 | 0.365  | -0.022 | -0.418 |
| 830                                        | 11.082          | 0.418  | -0.321 | 0.151  | 0.020  | 0.129  |
| 838                                        | 11.199          | -0.180 | -0.243 | 0.415  | -0.251 | -0.736 |
| 846                                        | 11.316          | 0.553  | 0.055  | -0.127 | -0.004 | 0.157  |
| 854                                        | 11.432          | 0.376  | -0.194 | 0.038  | 0.060  | -2.221 |
| 862                                        | 11.549          | -0.179 | -0.445 | 0.512  | -0.079 | 0.486  |
| 870                                        | 11.814          | 1.151  | -0.057 | -0.379 | 0.236  | 0.116  |
| 878                                        | 11.931          | 0.857  | -0.139 | -0.364 | 0.422  | 0.279  |
| 886                                        | 12.048          | 0.986  | -0.098 | -0.344 | 0.056  | 0.281  |
| 890                                        | 12.107          | 1.110  | -0.131 | -0.289 | 0.141  | 0.184  |
| 894                                        | 12.166          | 1.135  | -0.142 | -0.303 | 0.174  | 0.138  |
| 902                                        | 12.283          | 0.418  | -0.178 | 0.032  | -0.171 | 0.373  |
| 910                                        | 12.400          | 0.591  | -0.367 | 0.095  | 0.066  | 0.223  |
| 920                                        | 12.547          | 0.427  | -0.334 | 0.142  | 0.080  | 0.289  |
| 932                                        | 12.723          | 0.367  | -0.414 | 0.275  | -0.118 | 0.569  |
| 944                                        | 12.899          | -0.355 | -0.453 | 0.174  | -0.368 | 0.134  |
| 980                                        | 13.427          | -0.865 | -1.699 | -3.482 | -0.984 | -0.079 |
| 1000                                       | 13.721          | -1.601 | -0.704 | 0.383  | 0.483  | 0.031  |



## References

- Armand, L. K., Crosta, X., Romero, O. and Pichon, J.-J.: The biogeography of major diatom taxa in Southern Ocean sediments: 1. Sea ice related species, *Palaeogeography, Palaeoclimatology, Palaeoecology*, 223(1–2), 93–126, doi:10.1016/J.PALAEO.2005.02.015, 2005.
- Barcena, M.Á., Canals, M., Fabrès, J., Flores, J.A., Isla, E., Palanques, A. and Sierro, F.J.: Holocene neoglaciation events in the Bransfield Strait (Antarctica). Palaeoenvironmental and paleoclimatic significance. *Scientia Marina* 70, 607–619, 2006.
- Burke, A. and L. F. Robinson: The Southern Ocean's Role in Carbon Exchange During the Last Deglaciation. *Science* 335(6068): 557–561, 2012.
- Cárdenas, P., Lange, C. B., Vernet, M., Esper, O., Srain, B., Vorrath, M.-E., Ehrhardt, S., Müller, J., Kuhn, G., Arz, H. W., Lembke-Jene, L., Lamy, F.: Biogeochemical proxies and diatoms in surface sediments across the Drake Passage reflect oceanic domains and frontal systems in the region, *Progress in Oceanography*, 174, 72–88, doi:10.1016/j.pocean.2018.10.004, 2019.
- Crosta, X., Romero, O., Armand, L. K. and Pichon, J.-J.: The biogeography of major diatom taxa in Southern Ocean sediments: 2. Open ocean related species, *Palaeogeography, Palaeoclimatology, Palaeoecology*, 223(1–2), 66–92, doi:10.1016/j.palaeo.2005.03.028, 2005.
- Domack, E., Leventer, A., Dunbar, R., Taylor, F., Brachfeld, S., Sjunneskogs, C. and ODP Leg 178 Scientific Party: Chronology of the Palmer Deep site, Antarctic Peninsula: a Holocene palaeoenvironmental reference for the circum-Antarctic. *The Holocene*, 11(1), 1–9, doi:10.1191/095968301673881493, 2001.
- Esper, O. and Gersonde, R.: New tools for the reconstruction of Pleistocene Antarctic sea ice, *Palaeogeography, Palaeoclimatology, Palaeoecology*, 399, 260–283, doi:10.1016/J.PALAEO.2014.01.019, 2014a.
- Esper, O. and Gersonde, R.: Quaternary surface water temperature estimations: New diatom transfer functions for the Southern Ocean, *Palaeogeography, Palaeoclimatology, Palaeoecology*, 414, 1–19, doi:10.1016/J.PALAEO.2014.08.008, 2014b.
- Esper, O., Gersonde, R. and Kadagies, N.: Diatom distribution in southeastern Pacific surface sediments and their relationship to modern environmental variables, *Palaeogeography, Palaeoclimatology, Palaeoecology*, 287(1–4), 1–27, doi:10.1016/J.PALAEO.2009.12.006, 2010.
- Gersonde, R. and Zielinski, U.: The reconstruction of late Quaternary Antarctic sea-ice distribution — the use of diatoms as a proxy for sea-ice, *162*, 263–286, doi:10.1016/S0031-0182(00)00131-0, 2000.
- Heroy, D. C., Sjunneskog, C. and Anderson, J. B.: Holocene climate change in the Bransfield Basin, Antarctic Peninsula: evidence from sediment and diatom analysis, *Antarctic Science*, 20(01), 69–87, doi:10.1017/S0954102007000788, 2008.
- Massé, G., Belt, S. T., Crosta, X., Schmidt, S., Snape, I., Thomas, D. N. and Rowland, S. J.: Highly branched isoprenoids as proxies for variable sea ice conditions in the Southern Ocean, *Antarctic Science*, 23(05), 487–498, doi:10.1017/S0954102011000381, 2011.
- Romero, O. E., Armand, L. K., Crosta, X. and Pichon, J.-J.: The biogeography of major diatom taxa in Southern Ocean surface sediments: 3. Tropical/Subtropical species, *Palaeogeography, Palaeoclimatology, Palaeoecology*, 223(1–2), 49–65, doi:10.1016/j.palaeo.2005.03.027, 2005.
- Sinninghe Damsté, J. S., Rijpstra, W. I. C., Coolen, M. J. L., Schouten, S. and Volkman, J. K.: Rapid sulfurisation of highly branched isoprenoid (HBI) alkenes in sulfidic Holocene sediments from Ellis Fjord, Antarctica, *Organic Geochemistry*, 38(1), 128–139, doi:10.1016/j.orggeochem.2006.08.003, 2007.
- Vorrath, M.-E., Müller, J., Rebolledo, L., Cárdenas, P., Shi, X., Esper, O., Opel, T., Geibert, W., Muñoz, P., Haas, C., Kuhn, G., Lange, C. B., Lohmann, G. and Mollenhauer, G.: Sea ice dynamics in the Bransfield Strait, Antarctic Peninsula, during the past 240 years: a multi-proxy intercomparison study, *Climate of the Past*, 16(6), 2459–2483, doi:10.5194/cp-16-2459-2020, 2020.
- Zielinski, U. and Gersonde, R.: Diatom distribution in Southern Ocean surface sediments (Atlantic sector): Implications for paleoenvironmental reconstructions, *Palaeogeography, Palaeoclimatology, Palaeoecology*, 129(3–4), 213–250, doi:10.1016/S0031-0182(96)00130-7, 1997.
