# Supplementary material for: Deglacial and Holocene sea ice and climate dynamics at the Western Antarctic Peninsula
Source: Copernicus journal article supplement (doi:10.5194/egusphere-2022-804), 2022-08-24
Supplement: Supplementary file [file egusphere-2022-804-supplement_REVIEW.pdf › egusphere-2022-804-supplement_REVIEW.pdf]

Supplements

Section 1: Radiocarbon dating

Table S1: Radiocarbon dating data including sample name and number, material, conventional age plus error, the modelled age for correction, ventilation age, corrected age and final calibrated ages with error.

| Sample depth [cmbsf] | Sample Name        | AWI-No.  | Material   | Conventional <sup>14</sup> C age [ <sup>14</sup> C a BP] | Error of conv. <sup>14</sup> C age [a] | Modelled age for correction after Butzing et al. (2017) [a] | Ventilation age for correction [a] | Corrected <sup>14</sup> C age for calibration [a BP] | Calibrated age [cal. A BP] | Error for calibrated age [a] |
|----------------------|--------------------|----------|------------|----------------------------------------------------------|----------------------------------------|-------------------------------------------------------------|------------------------------------|------------------------------------------------------|----------------------------|------------------------------|
| 190                  | PS97/072-1_190cm   | 1428.1.1 | calcareous | 5076                                                     | 118                                    | 1076                                                        | 1200                               | 2800                                                 | 2936                       | 118                          |
| 212                  | PS97/072-1_212cm   | 2744.1.1 | calcareous | 5246                                                     | 82                                     | 1107                                                        | 1200                               | 2939                                                 | 3096                       | 82                           |
| 312                  | PS97/072-1_312cm   | 1429.2.1 | calcareous | 6054                                                     | 118                                    | 1083                                                        | 1200                               | 3771                                                 | 4150                       | 118                          |
| 340                  | PS97/072-1_340cm   | 1430.1.1 | calcareous | 6156                                                     | 52                                     | 1089                                                        | 1200                               | 3867                                                 | 4291                       | 52                           |
| 451.5                | PS97/072-1_451.5cm | 1431.1.1 | calcareous | 7081                                                     | 52                                     | 1142                                                        | 1200                               | 4739                                                 | 5478                       | 52                           |
| 464                  | PS97/072-1_464cm   | 1432.2.1 | calcareous | 7329                                                     | 117                                    | 1157                                                        | 1200                               | 4972                                                 | 5720                       | 117                          |
| 866.5                | PS97/072-1_866.5cm | 7405.1.1 | calcareous | 12865                                                    | 101                                    | 1599                                                        | 1200                               | 10066                                                | 11600                      | 101                          |
| 868.5                | PS97/072-1_868.5cm | 7406.1.1 | calcareous | 12983                                                    | 100                                    | 1571                                                        | 1200                               | 10212                                                | 11903                      | 100 *                        |

Are these errors just copied from the conventional age or actually calculated for the corrected and calibrated ages? If calculated, how?

\* If the errors were derived from the outputs of the Bayesian age modelling, I would expect the error to be larger for the 868.5 cm date since there is no constraint on the age of sediment below this depth.

Section 2: Matching piston core PS97/072-1 and short core PS97/072-2

We matched the core top of piston core PS97/072-1 with the short core PS97/072-2 from the same sample site (and from the same cruise) using TOC and biogenic opal data (Fig. S1). An age model for the short core was already developed based on <sup>210</sup>Pb dating done by Vorrath et al. (2020). By overlapping the data we found that the top of the piston core is likely matching with the short core in a depth of 25 cm which corresponds to the calendar year 1902 in the common era. Therefore, we have set the core top of PS97/072-1 to 0.05 ka BP.

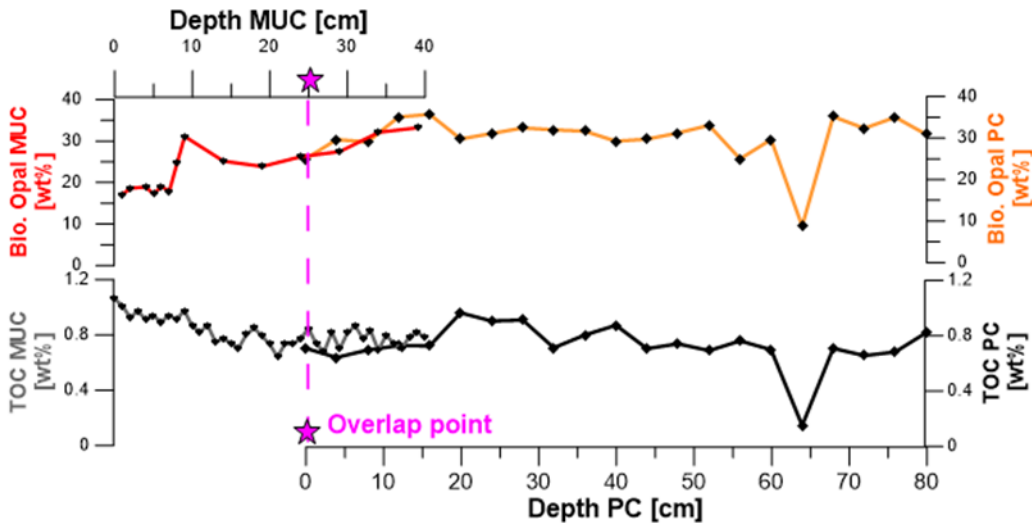

Figure S2: Overlap point of the short sediment core (MUC) and piston core (PC) based on total organic carbon and biogenic opal (wt%). Data from the short core from Vorrath 2020,

**Section 3: Stable isotopes of TOC and IPSO<sub>25</sub>**

Organic carbon stable isotope ratios ( $\delta^{13}\text{C}$ ) range between -22.2 and -25.5‰, while the stable carbon isotope composition of IPSO<sub>25</sub> varies between -15.1‰ and -19.5‰ supporting its origin from sea ice algae (Massé et al., 2011; Sinninghe Damsté et al., 2007). The mean molar C/N ratio below 8.5 and BIT indices below 0.05 indicate a marine origin of the organic matter and that the input of terrigenous organic matter did not affect the composition of GDGTs.

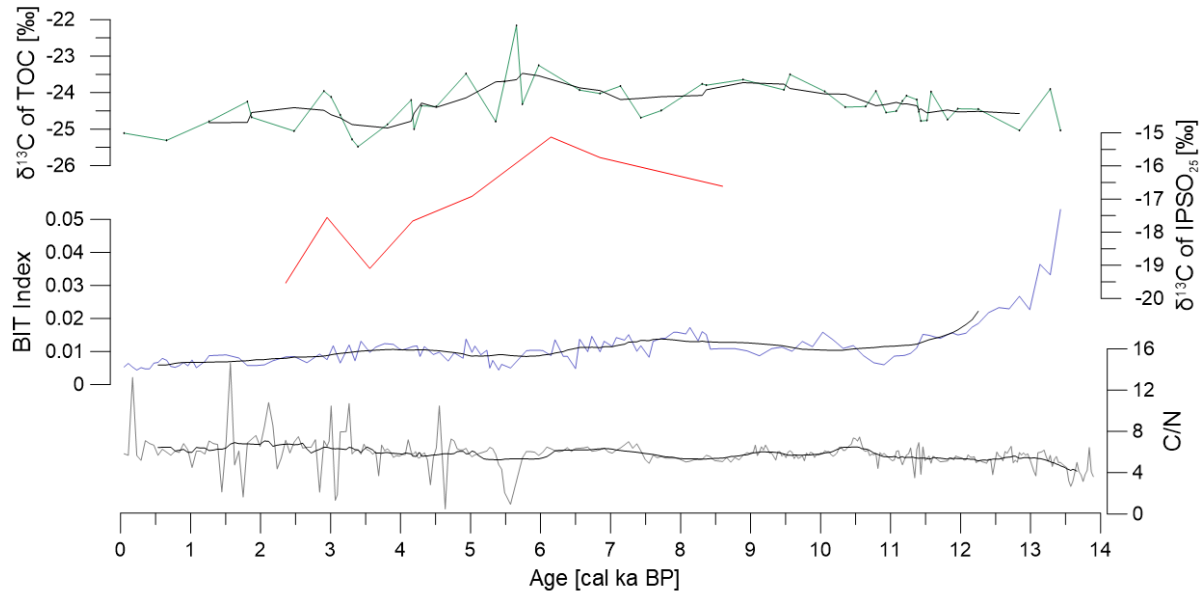

**Figure S3: The stable isotope composition of a) TOC and b) IPSO<sub>25</sub>, the c) BIT index and d) C/N ratio of core PS97/72-1.**

**Section 4: PCA of diatom assemblages**

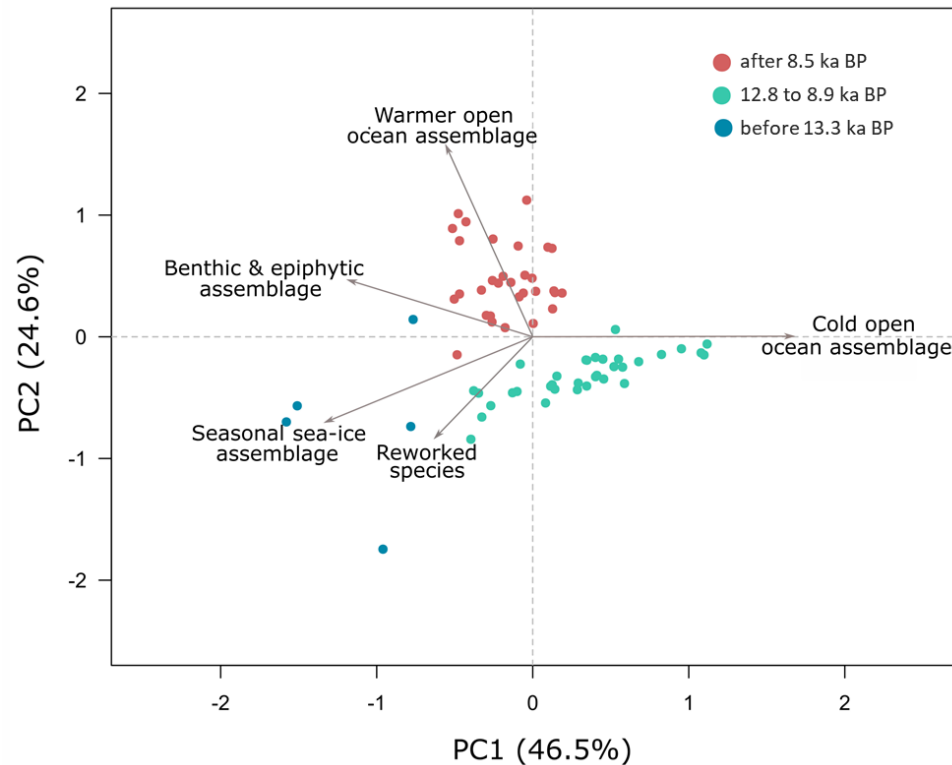

Need to make it clear whether the PCA was performed using the grouped diatom data or the ungrouped species and genera? If the latter, how were the position and length of the arrows for the groups determined?

You should also give a significance score (+/- 1 or 2 sigma) for each of the axes - either on the plot, in the figure caption or in the text.

As it isn't possible to evaluate the relationship between the ages and assemblage-types beyond the three age classes used here, it would be better if you either included the PCA data tables too OR replaced the three age groups with a colour spectrum/gradient for the whole age range.

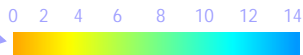

30

31 **Figure S4: The Spearman principal component analysis (PCA) biplot shows the relationship between the five diatom**  
32 **assemblages indicative for an open warmer and open colder ocean, seasonal sea-ice, benthic and reworked fossils in**  
33 **core PS97/072-1. PC1 represents 45.7% and PC2 25.7% represents of the variance. Before 16.7 ka BP seasonal sea-ice**  
34 **diatoms are common, between 15.8 ka and 9.8 ka BP assemblages of a colder open ocean are dominant whereas a**  
35 **warmer open ocean is indicated by diatom assemblages from 9.3 ka BP until today.**

These descriptions are misleading. The PCA extracts which species/assemblages are most important in explaining variability not dominance.

Section 5: Diatom concentrations

Table S5: Diatom concentrations (%) of species from all samples, valves per gram and grouping of seasonal sea-ice, open ocean cold, open ocean warm, fossil, benthic and epiphytic assemblages.

| Event                                            | PS97/072-1 | PS97/072-1 | PS97/072-1 | PS97/072-1 | PS97/072-1 | PS97/072-1 | PS97/072-1 | PS97/072-1 | PS97/072-1 | PS97/072-1 | PS97/072-1 |
|--------------------------------------------------|------------|------------|------------|------------|------------|------------|------------|------------|------------|------------|------------|
| Depth [m]                                        | 0.00       | 0.04       | 0.40       | 0.80       | 1.20       | 1.28       | 1.36       | 1.44       | 1.52       | 1.60       | 1.68       |
| Achnanthes brevipes [%]                          | 0.00       | 0.00       | 0.00       | 0.00       | 0.00       | 0.00       | 0.00       | 0.00       | 0.00       | 0.00       | 0.00       |
| Amphora copulata [%]                             | 0.00       | 0.00       | 0.00       | 0.00       | 0.00       | 0.00       | 0.00       | 0.00       | 0.00       | 0.00       | 0.00       |
| Amphora coffeaeformis [%]                        | 0.00       | 0.00       | 0.00       | 0.00       | 0.00       | 0.00       | 0.00       | 0.00       | 0.00       | 0.00       | 0.00       |
| Cocconeis costata [%]                            | 0.00       | 0.20       | 0.00       | 0.00       | 0.00       | 0.00       | 0.00       | 0.00       | 0.00       | 0.00       | 0.00       |
| Cocconeis dalmannii [%]                          | 0.00       | 0.00       | 0.00       | 0.00       | 0.00       | 0.00       | 0.00       | 0.00       | 0.00       | 0.00       | 0.00       |
| Cocconeis fasciolata [%]                         | 0.00       | 0.10       | 0.37       | 0.40       | 0.00       | 0.00       | 0.00       | 0.00       | 0.00       | 0.00       | 0.00       |
| Cocconeis californica var californica [%]        | 0.00       | 0.10       | 0.00       | 0.00       | 0.00       | 0.00       | 0.17       | 0.00       | 0.00       | 0.00       | 0.00       |
| Cocconeis californica var. kerguelensis [%]      | 0.00       | 0.00       | 0.00       | 0.00       | 0.00       | 0.00       | 0.00       | 0.00       | 0.00       | 0.00       | 0.00       |
| Cocconeis melchiorigoides [%]                    | 0.00       | 0.00       | 0.37       | 0.00       | 0.00       | 0.00       | 0.00       | 0.00       | 0.00       | 0.00       | 0.00       |
| Cocconeis imperatrix [%]                         | 0.00       | 0.00       | 0.00       | 0.00       | 0.00       | 0.00       | 0.00       | 0.00       | 0.00       | 0.00       | 0.00       |
| Cocconeis sp. 1 [%]                              | 0.00       | 0.00       | 0.00       | 0.00       | 0.00       | 0.00       | 0.00       | 0.00       | 0.00       | 0.00       | 0.00       |
| Cocconeis sp. 2 [%]                              | 0.00       | 0.10       | 0.00       | 0.00       | 0.00       | 0.00       | 0.00       | 0.00       | 0.00       | 0.00       | 0.00       |
| Entopilla ocellata [%]                           | 0.00       | 0.00       | 0.00       | 0.00       | 0.00       | 0.00       | 0.00       | 0.00       | 0.00       | 0.00       | 0.00       |
| Fallacia marnieri [%]                            | 0.00       | 0.00       | 0.00       | 0.00       | 0.00       | 0.00       | 0.00       | 0.00       | 0.17       | 0.00       | 0.00       |
| Gomphomenopsis littoralis [%]                    | 0.20       | 0.00       | 0.00       | 0.00       | 0.00       | 0.21       | 0.00       | 0.00       | 0.17       | 0.00       | 0.00       |
| Grammatophora angulosa [%]                       | 0.00       | 0.00       | 0.00       | 0.00       | 0.00       | 0.00       | 0.00       | 0.00       | 0.00       | 0.00       | 0.00       |
| Licmophora gracilis [%]                          | 0.00       | 0.00       | 0.00       | 0.00       | 0.00       | 0.00       | 0.00       | 0.00       | 0.00       | 0.00       | 0.00       |
| Melosira adeliae [%]                             | 0.00       | 0.00       | 0.00       | 0.00       | 0.00       | 0.00       | 0.00       | 0.00       | 0.00       | 0.00       | 0.00       |
| Navicula directa [%]                             | 0.00       | 0.20       | 0.19       | 0.00       | 0.22       | 0.00       | 0.00       | 0.00       | 0.17       | 0.00       | 0.00       |
| Navicula glaciei [%]                             | 0.00       | 0.00       | 0.00       | 0.00       | 0.00       | 0.00       | 0.00       | 0.00       | 0.00       | 0.00       | 0.00       |
| Navicula imperfecta [%]                          | 0.00       | 0.00       | 0.00       | 0.00       | 0.00       | 0.00       | 0.00       | 0.00       | 0.00       | 0.00       | 0.00       |
| Navicula perminuta [%]                           | 0.40       | 0.20       | 0.00       | 0.00       | 0.00       | 0.00       | 0.00       | 0.00       | 0.00       | 0.00       | 0.00       |
| Paralia sulcata [%]                              | 0.00       | 0.00       | 0.00       | 0.00       | 0.00       | 0.00       | 0.00       | 0.00       | 0.00       | 0.00       | 0.00       |
| Planothidium vicentii [%]                        | 0.00       | 0.00       | 0.00       | 0.00       | 0.00       | 0.00       | 0.00       | 0.00       | 0.00       | 0.00       | 0.00       |
| Pseudogomphonema kantschaticum [%]               | 0.00       | 0.00       | 0.37       | 0.00       | 0.00       | 0.00       | 0.00       | 0.19       | 0.00       | 0.00       | 0.00       |
| Actinocyclus actinochilus [%]                    | 1.20       | 0.50       | 0.74       | 0.40       | 0.66       | 1.03       | 0.17       | 0.75       | 0.17       | 0.00       | 0.22       |
| Berkeleya spp. [%]                               | 0.00       | 0.00       | 0.00       | 0.00       | 0.00       | 0.00       | 0.00       | 0.00       | 0.00       | 0.00       | 0.00       |
| Corethron pennatum [%]                           | 0.40       | 0.20       | 0.00       | 0.20       | 0.22       | 0.00       | 0.00       | 0.94       | 0.33       | 0.00       | 0.00       |
| Eucampia antarctica var.recta [%]                | 0.00       | 0.10       | 0.19       | 0.20       | 0.00       | 0.00       | 0.00       | 0.00       | 0.00       | 0.45       | 0.00       |
| Fragilariopsis curta [%]                         | 2.60       | 1.39       | 1.11       | 1.39       | 2.41       | 1.24       | 1.17       | 0.75       | 2.49       | 1.11       | 0.00       |
| Fragilariopsis cylindrus [%]                     | 0.00       | 1.09       | 1.48       | 0.59       | 0.00       | 0.00       | 0.33       | 0.19       | 0.33       | 0.22       | 0.22       |
| Fragilariopsis nana [%]                          | 0.00       | 0.00       | 0.00       | 0.00       | 0.00       | 0.00       | 0.00       | 0.00       | 0.00       | 0.00       | 0.00       |
| Fragilariopsis obliquecostata [%]                | 0.40       | 0.00       | 0.00       | 0.59       | 0.22       | 0.41       | 0.00       | 0.19       | 0.00       | 0.22       | 0.00       |
| Fragilariopsis peragallii [%]                    | 0.20       | 0.00       | 0.00       | 0.00       | 0.00       | 0.00       | 0.00       | 0.19       | 0.00       | 0.00       | 0.22       |
| Fragilariopsis rhombica [%]                      | 0.20       | 0.40       | 0.00       | 0.20       | 0.00       | 0.21       | 0.17       | 0.19       | 0.17       | 0.00       | 0.00       |
| Fragilariopsis ritscheri [%]                     | 0.00       | 0.00       | 0.19       | 0.20       | 0.44       | 0.00       | 0.00       | 0.19       | 0.17       | 0.22       | 0.00       |
| Fragilariopsis sublinearis [%]                   | 0.00       | 0.20       | 0.00       | 0.00       | 0.22       | 0.41       | 0.00       | 0.19       | 0.00       | 0.00       | 0.43       |
| Fragilariopsis sublin/obliq [%]                  | 0.00       | 0.00       | 0.19       | 0.00       | 0.00       | 0.00       | 0.00       | 0.00       | 0.00       | 0.00       | 0.00       |
| Fragilariopsis vanheurckii [%]                   | 0.00       | 0.10       | 0.00       | 0.20       | 0.22       | 0.00       | 0.00       | 0.00       | 0.33       | 0.00       | 0.43       |
| Neodenticula seminae [%]                         | 0.00       | 0.00       | 0.00       | 0.00       | 0.00       | 0.00       | 0.00       | 0.00       | 0.17       | 0.00       | 0.00       |
| Nitzschia stellata [%]                           | 0.00       | 0.00       | 0.00       | 0.00       | 0.00       | 0.00       | 0.00       | 0.19       | 0.00       | 0.00       | 0.00       |
| N. taenniformis [%]                              | 0.40       | 0.00       | 0.00       | 0.00       | 0.00       | 0.00       | 0.00       | 0.00       | 0.00       | 0.00       | 0.00       |
| Odontella weissflogii [%]                        | 1.80       | 1.49       | 0.56       | 2.57       | 0.44       | 1.24       | 0.33       | 0.75       | 0.83       | 0.00       | 0.65       |
| Porosira glacialis [%]                           | 0.20       | 0.40       | 0.00       | 0.40       | 0.00       | 0.21       | 0.17       | 0.19       | 0.33       | 0.00       | 0.00       |
| Porosira pseudodenticulata [%]                   | 0.00       | 0.10       | 0.00       | 0.20       | 0.44       | 0.00       | 0.00       | 0.00       | 0.00       | 0.00       | 0.00       |
| Porosira spp. [%]                                | 0.40       | 0.10       | 0.00       | 0.00       | 0.00       | 0.00       | 0.17       | 0.75       | 0.33       | 0.00       | 0.65       |
| Stellarima microtrias (rs and veg) [%]           | 0.40       | 0.20       | 0.00       | 0.00       | 0.00       | 0.00       | 0.50       | 0.19       | 0.00       | 0.00       | 0.00       |
| Synedropsis laevis [%]                           | 0.00       | 0.00       | 0.00       | 0.00       | 0.00       | 0.00       | 0.00       | 0.00       | 0.00       | 0.00       | 0.00       |
| Synedropsis recta [%]                            | 0.60       | 0.00       | 0.00       | 0.00       | 0.00       | 0.00       | 0.17       | 0.00       | 0.00       | 0.00       | 0.00       |
| Synedra/Synedropsis spp. [%]                     | 0.00       | 0.00       | 0.00       | 0.00       | 0.00       | 0.00       | 0.00       | 0.00       | 0.00       | 0.00       | 0.00       |
| Synedropsis sp. [%]                              | 0.00       | 0.00       | 0.37       | 0.00       | 0.00       | 0.00       | 0.00       | 0.00       | 0.00       | 0.00       | 0.00       |
| Thalassiosira antarctica (T1=cold) [%]           | 0.00       | 0.00       | 0.00       | 0.00       | 0.00       | 0.00       | 0.00       | 0.19       | 0.00       | 0.00       | 0.00       |
| Asteromphalus hookeri [%]                        | 0.00       | 0.00       | 0.00       | 0.20       | 0.00       | 0.00       | 0.00       | 0.00       | 0.00       | 0.00       | 0.00       |
| Asteromphalus hyalinus [%]                       | 0.20       | 0.00       | 0.00       | 0.00       | 0.00       | 0.00       | 0.00       | 0.00       | 0.00       | 0.00       | 0.00       |
| Eucampia antarctica var. antarctica [%]          | 0.00       | 0.00       | 0.00       | 0.00       | 0.00       | 0.00       | 0.00       | 0.00       | 0.00       | 0.00       | 0.00       |
| Fragilariopsis pseudonana [%]                    | 0.00       | 0.00       | 0.00       | 0.00       | 0.00       | 0.00       | 0.00       | 0.00       | 0.00       | 0.00       | 0.00       |
| Fragilariopsis separanda [%]                     | 0.00       | 0.10       | 0.00       | 0.00       | 0.00       | 0.21       | 0.00       | 0.00       | 0.00       | 0.00       | 0.22       |
| Proboscia inermis (winter) [%]                   | 0.40       | 1.19       | 0.00       | 0.00       | 1.97       | 0.21       | 0.33       | 0.00       | 0.83       | 0.00       | 0.22       |
| Proboscia inermis (spring) [%]                   | 0.00       | 0.10       | 0.00       | 0.00       | 0.00       | 0.00       | 0.00       | 0.00       | 0.00       | 0.00       | 0.00       |
| Proboscia alata [%]                              | 0.00       | 0.10       | 0.00       | 0.00       | 0.00       | 0.00       | 0.00       | 0.00       | 0.00       | 0.00       | 0.00       |
| Proboscia spp. [%]                               | 0.00       | 0.00       | 0.37       | 0.40       | 0.00       | 0.00       | 0.00       | 0.00       | 0.00       | 0.45       | 0.00       |
| Pseudo-nitzschia turgiduloides [%]               | 0.00       | 0.20       | 0.00       | 0.20       | 0.44       | 0.21       | 0.50       | 0.00       | 0.00       | 0.22       | 0.00       |
| Rhizosolenia antennata f. antennata [%]          | 0.20       | 0.00       | 0.00       | 0.00       | 0.22       | 0.00       | 0.00       | 0.00       | 0.00       | 0.00       | 0.00       |
| R. antennata f. semispina [%]                    | 0.40       | 0.50       | 2.04       | 0.59       | 0.88       | 1.03       | 0.50       | 0.00       | 0.00       | 0.45       | 0.22       |
| R. polydactyla f. polydactyla [%]                | 0.00       | 0.00       | 0.19       | 0.00       | 0.00       | 0.00       | 0.00       | 0.00       | 0.00       | 0.00       | 0.00       |
| R. simplex [%]                                   | 0.60       | 0.20       | 0.00       | 0.20       | 0.44       | 1.03       | 0.50       | 0.00       | 0.33       | 0.00       | 0.22       |
| Shionodiscus gracilis var. expectus [%]          | 0.80       | 1.19       | 0.56       | 0.79       | 0.22       | 1.03       | 1.50       | 0.00       | 0.17       | 0.89       | 0.43       |
| Shionodiscus gracilis var. gracilis [%]          | 1.20       | 1.39       | 0.74       | 5.94       | 0.44       | 0.83       | 1.83       | 0.56       | 0.83       | 1.56       | 1.08       |
| Shionodiscus frenguelliopsis [%]                 | 1.40       | 1.49       | 0.00       | 0.00       | 0.44       | 1.24       | 0.00       | 1.51       | 0.66       | 0.00       | 0.43       |
| Thalassiosira antarctica (veg+RS) [%]            | 3.60       | 4.37       | 2.78       | 2.38       | 0.66       | 2.89       | 2.17       | 2.82       | 2.82       | 0.45       | 2.59       |
| Thalassiosira gravida [%]                        | 0.20       | 0.00       | 0.00       | 0.00       | 0.00       | 0.00       | 0.00       | 0.00       | 0.00       | 0.00       | 0.00       |
| Thalassiosira lentiginosa [%]                    | 0.80       | 0.79       | 0.37       | 0.20       | 0.22       | 0.62       | 0.50       | 0.75       | 0.17       | 0.00       | 0.00       |
| Thalassiosira maculata [%]                       | 0.00       | 0.00       | 0.00       | 0.00       | 0.00       | 0.00       | 0.00       | 0.19       | 0.00       | 0.00       | 0.00       |
| Thalassiosira oliverana [%]                      | 0.00       | 0.00       | 0.00       | 0.00       | 0.00       | 0.00       | 0.00       | 0.00       | 0.00       | 0.00       | 0.00       |
| Thalassiosira ritscheri [%]                      | 0.00       | 0.00       | 0.00       | 0.20       | 0.00       | 0.00       | 0.17       | 0.19       | 0.17       | 0.00       | 0.00       |
| Thalassiosira scotia [%]                         | 0.40       | 0.10       | 0.00       | 0.79       | 0.22       | 0.00       | 0.00       | 0.00       | 0.33       | 0.67       | 0.00       |
| Thalassiosira antarctica/scotia [%]              | 0.00       | 0.00       | 0.00       | 0.40       | 0.00       | 0.21       | 1.17       | 0.19       | 0.33       | 0.45       | 0.65       |
| Thalassiosira tumida [%]                         | 0.00       | 0.10       | 0.00       | 0.20       | 0.00       | 0.00       | 0.00       | 0.00       | 0.00       | 0.00       | 0.00       |
| Thalassiothrix antarctica [%]                    | 0.00       | 0.00       | 0.00       | 0.00       | 0.22       | 0.00       | 0.00       | 0.00       | 0.17       | 0.22       | 0.22       |
| Trichotoxon reinboldii [%]                       | 0.00       | 0.00       | 0.00       | 0.00       | 0.00       | 0.21       | 0.17       | 0.00       | 0.33       | 0.00       | 0.00       |
| Azpeitia tabularis [%]                           | 0.00       | 0.00       | 0.00       | 0.00       | 0.00       | 0.00       | 0.00       | 0.00       | 0.00       | 0.00       | 0.00       |
| Coscinodiscus acculus-irridis [%]                | 0.20       | 0.00       | 0.00       | 0.00       | 0.00       | 0.00       | 0.00       | 0.00       | 0.17       | 0.00       | 0.00       |
| Fragilariopsis kerguelensis [%]                  | 3.40       | 1.49       | 1.30       | 1.39       | 1.31       | 0.83       | 1.67       | 0.56       | 1.99       | 0.22       | 1.08       |
| Nitzschia bicapitata [%]                         | 0.00       | 0.10       | 0.00       | 0.00       | 0.00       | 0.00       | 0.00       | 0.00       | 0.00       | 0.00       | 0.00       |
| Shionodiscus oestrupii [%]                       | 0.00       | 0.00       | 0.00       | 0.00       | 0.00       | 0.00       | 0.00       | 0.00       | 0.00       | 0.00       | 0.00       |
| Stephanopyxis turris [%]                         | 0.00       | 0.00       | 0.00       | 0.00       | 0.00       | 0.00       | 0.00       | 0.00       | 0.00       | 0.00       | 0.00       |
| Actinocyclus ingens [%]                          | 0.00       | 0.00       | 0.00       | 0.00       | 0.00       | 0.00       | 0.00       | 0.00       | 0.00       | 0.00       | 0.00       |
| Cladogramma sp. [%]                              | 0.00       | 0.00       | 0.00       | 0.00       | 0.00       | 0.00       | 0.00       | 0.00       | 0.00       | 0.00       | 0.00       |
| Rouxia constricta [%]                            | 0.00       | 0.00       | 0.00       | 0.00       | 0.00       | 0.00       | 0.00       | 0.00       | 0.00       | 0.00       | 0.00       |
| Rouxia leventerae [%]                            | 0.00       | 0.00       | 0.00       | 0.00       | 0.00       | 0.00       | 0.00       | 0.00       | 0.00       | 0.00       | 0.00       |
| Unidentified taxa [%]                            | 0.80       | 0.20       | 0.56       | 1.39       | 0.22       | 0.62       | 0.67       | 0.75       | 0.66       | 0.00       | 0.43       |
| Chaetoceros resting spores [%]                   | 76.00      | 79.27      | 84.97      | 77.23      | 86.65      | 83.88      | 85.00      | 86.44      | 83.89      | 92.20      | 89.42      |
| Total [%]                                        | 100.00     | 100.00     | 100.00     | 100.00     | 100.00     | 100.00     | 100.00     | 100.00     | 100.00     | 100.00     | 100.00     |
| diatom counted                                   | 500        | 1008       | 539        | 505        | 457        | 485        | 600        | 533        | 602        | 449        | 654        |
| Diatom concentration [valves/g]                  | 1.12E+08   | 6.15E+07   | 1.16E+08   | 7.47E+07   | 2.02E+08   | 1.18E+08   | 1.43E+08   | 7.04E+07   | 1.82E+08   | 1.57E+08   | 3.66E+08   |
| seasonal sea-ice assemblage [% without CRS]      | 35.06      | 30.02      | 27.87      | 39.59      | 36.04      | 26.53      | 23.61      | 37.58      | 40.83      | 33.33      | 31.60      |
| open ocean cold assemblage [% without CRS]       | 49.44      | 56.35      | 58.38      | 44.65      | 51.29      | 59.59      | 59.55      | 46.14      | 44.38      | 51.78      | 52.36      |
| open ocn warm assemblage [% without CRS]         | 11.69      | 7.16       | 5.84       | 7.88       | 7.72       | 8.16       | 12.53      | 9.81       | 9.27       | 9.85       | 11.56      |
| fossil species [% without CRS]                   | 0.00       | 0.00       | 0.00       | 0.00       | 0.00       | 0.00       | 0.00       | 0.00       | 0.00       | 0.00       | 0.00       |
| benthic and epiphytic assemblage [% without CRS] | 2.25       | 4.62       | 5.65       | 2.44       | 1.19       | 2.24       | 2.46       | 2.92       | 3.55       | 1.89       | 1.89       |
| Diatom concentration [valve/g without CRS]       | 2.72E+07   | 1.32E+07   | 1.28E+07   | 1.63E+07   | 2.51E+07   | 1.49E+07   | 2.03E+07   | 1.27E+07   | 2.17E+07   | 1.43E+07   | 2.03E+07   |

| Event                                            | PS97/072-1 | PS97/072-1 | PS97/072-1 | PS97/072-1 | PS97/072-1 | PS97/072-1 | PS97/072-1 | PS97/072-1 | PS97/072-1 | PS97/072-1 | PS97/072-1 |
|--------------------------------------------------|------------|------------|------------|------------|------------|------------|------------|------------|------------|------------|------------|
| Depth [m]                                        | 1.76       | 1.84       | 1.92       | 2.00       | 2.16       | 2.24       | 2.32       | 2.40       | 2.48       | 2.80       | 2.96       |
| Achnanthes brevipes [%]                          | 0.00       | 0.00       | 0.00       | 0.00       | 0.00       | 0.00       | 0.00       | 0.00       | 0.00       | 0.00       | 0.00       |
| Amphora copulata [%]                             | 0.00       | 0.00       | 0.00       | 0.17       | 0.00       | 0.00       | 0.00       | 0.00       | 0.00       | 0.00       | 0.00       |
| Amphora coffeaeformis [%]                        | 0.00       | 0.00       | 0.00       | 0.00       | 0.00       | 0.00       | 0.00       | 0.00       | 0.00       | 0.00       | 0.00       |
| Cocconeis costata [%]                            | 0.00       | 0.41       | 0.00       | 0.00       | 0.00       | 0.00       | 0.00       | 0.00       | 0.00       | 0.00       | 0.00       |
| Cocconeis dalmannii [%]                          | 0.00       | 0.00       | 0.00       | 0.00       | 0.00       | 0.00       | 0.49       | 0.00       | 0.00       | 0.00       | 0.00       |
| Cocconeis fasciolata [%]                         | 0.00       | 0.21       | 0.00       | 0.00       | 0.00       | 0.00       | 0.00       | 0.17       | 0.00       | 0.00       | 0.00       |
| Cocconeis californica var californica [%]        | 0.00       | 0.00       | 0.18       | 0.00       | 0.00       | 0.00       | 0.33       | 0.00       | 0.00       | 0.00       | 0.00       |
| Cocconeis californica var. kerguelensis [%]      | 0.00       | 0.00       | 0.00       | 0.00       | 0.00       | 0.00       | 0.00       | 0.17       | 0.00       | 0.00       | 0.00       |
| Cocconeis melchioroides [%]                      | 0.43       | 0.00       | 0.00       | 0.00       | 0.00       | 0.00       | 0.00       | 0.00       | 0.00       | 0.00       | 0.18       |
| Cocconeis imperatrix [%]                         | 0.00       | 0.00       | 0.00       | 0.00       | 0.00       | 0.00       | 0.16       | 0.00       | 0.00       | 0.00       | 0.00       |
| Cocconeis sp. 1 [%]                              | 0.00       | 0.00       | 0.00       | 0.00       | 0.00       | 0.00       | 0.00       | 0.17       | 0.00       | 0.00       | 0.00       |
| Cocconeis sp. 2 [%]                              | 0.00       | 0.00       | 0.00       | 0.00       | 0.00       | 0.00       | 0.00       | 0.00       | 0.00       | 0.00       | 0.00       |
| Entopilla ocellata [%]                           | 0.00       | 0.00       | 0.00       | 0.00       | 0.00       | 0.00       | 0.00       | 0.00       | 0.00       | 0.00       | 0.00       |
| Fallacia marnieri [%]                            | 0.00       | 0.00       | 0.00       | 0.00       | 0.00       | 0.00       | 0.00       | 0.00       | 0.00       | 0.00       | 0.18       |
| Gomphomenopsis littoralis [%]                    | 0.00       | 0.00       | 0.00       | 0.00       | 0.00       | 0.00       | 0.00       | 0.00       | 0.00       | 0.00       | 0.00       |
| Grammatophora angulosa [%]                       | 0.00       | 0.00       | 0.00       | 0.00       | 0.00       | 0.00       | 0.00       | 0.00       | 0.00       | 0.00       | 0.00       |
| Licmophora gracilis [%]                          | 0.00       | 0.00       | 0.00       | 0.00       | 0.00       | 0.00       | 0.00       | 0.00       | 0.00       | 0.00       | 0.00       |
| Melosira adeliae [%]                             | 0.00       | 0.00       | 0.00       | 0.00       | 0.00       | 0.00       | 0.00       | 0.00       | 0.00       | 0.00       | 0.00       |
| Navicula directa [%]                             | 0.00       | 0.21       | 0.18       | 0.00       | 0.20       | 0.00       | 0.00       | 0.35       | 0.21       | 0.00       | 0.00       |
| Navicula glaciei [%]                             | 0.00       | 0.00       | 0.18       | 0.00       | 0.00       | 0.00       | 0.00       | 0.00       | 0.00       | 0.41       | 0.00       |
| Navicula imperfecta [%]                          | 0.00       | 0.00       | 0.00       | 0.00       | 0.20       | 0.00       | 0.00       | 0.00       | 0.00       | 0.00       | 0.00       |
| Navicula perminuta [%]                           | 0.00       | 0.21       | 0.00       | 0.00       | 0.00       | 0.00       | 0.16       | 0.00       | 0.43       | 0.00       | 0.00       |
| Paralia sulcata [%]                              | 0.00       | 0.00       | 0.00       | 0.00       | 0.00       | 0.00       | 0.00       | 0.00       | 0.00       | 0.00       | 0.00       |
| Planothidium vicientii [%]                       | 0.00       | 0.00       | 0.00       | 0.00       | 0.00       | 0.00       | 0.00       | 0.00       | 0.00       | 0.00       | 0.00       |
| Pseudogomphonema kantschaticum [%]               | 0.22       | 0.00       | 0.00       | 0.00       | 0.00       | 0.00       | 0.00       | 0.17       | 0.00       | 0.00       | 0.00       |
| Actinocyclus actinochilus [%]                    | 0.00       | 0.00       | 0.18       | 0.00       | 0.20       | 0.41       | 0.82       | 0.00       | 0.21       | 0.20       | 0.55       |
| Berkeleya spp. [%]                               | 0.00       | 0.00       | 0.00       | 0.00       | 0.00       | 0.00       | 0.00       | 0.00       | 0.00       | 0.00       | 0.00       |
| Corethron pennatum [%]                           | 0.00       | 0.41       | 0.18       | 0.17       | 0.40       | 0.00       | 0.16       | 0.00       | 0.00       | 0.00       | 0.37       |
| Eucampia antarctica var. recta [%]               | 0.22       | 0.00       | 0.00       | 0.17       | 0.00       | 0.00       | 0.33       | 0.00       | 0.21       | 0.00       | 0.00       |
| Fragilariopsis curta [%]                         | 0.22       | 0.83       | 0.71       | 0.51       | 0.79       | 0.20       | 1.81       | 1.92       | 1.91       | 1.43       | 1.83       |
| Fragilariopsis cylindrus [%]                     | 0.22       | 0.41       | 0.18       | 1.19       | 0.00       | 0.00       | 0.00       | 0.52       | 0.00       | 0.20       | 0.92       |
| Fragilariopsis nana [%]                          | 0.00       | 0.00       | 0.00       | 0.00       | 0.00       | 0.00       | 0.00       | 0.00       | 0.00       | 0.00       | 0.00       |
| Fragilariopsis obliquecostata [%]                | 0.00       | 0.00       | 0.00       | 0.00       | 0.20       | 0.00       | 0.16       | 0.17       | 0.00       | 0.00       | 0.37       |
| Fragilariopsis peragallii [%]                    | 0.00       | 0.00       | 0.00       | 0.00       | 0.00       | 0.00       | 0.00       | 0.00       | 0.00       | 0.00       | 0.00       |
| Fragilariopsis rhombica [%]                      | 0.43       | 0.00       | 0.18       | 0.17       | 0.59       | 0.61       | 0.33       | 0.35       | 0.64       | 0.00       | 0.00       |
| Fragilariopsis ritscheri [%]                     | 0.00       | 0.00       | 0.00       | 0.00       | 0.20       | 0.20       | 0.33       | 0.00       | 0.00       | 0.00       | 0.00       |
| Fragilariopsis sublinearis [%]                   | 0.00       | 0.00       | 0.35       | 0.00       | 0.00       | 0.00       | 0.33       | 0.00       | 0.21       | 0.20       | 0.00       |
| Fragilariopsis sublin/obliq [%]                  | 0.00       | 0.00       | 0.00       | 0.17       | 0.00       | 0.00       | 0.00       | 0.00       | 0.00       | 0.00       | 0.00       |
| Fragilariopsis vanheurckii [%]                   | 0.43       | 0.21       | 0.00       | 0.51       | 0.59       | 0.20       | 0.33       | 0.00       | 0.43       | 0.00       | 0.37       |
| Neodenticula seminae [%]                         | 0.00       | 0.00       | 0.00       | 0.00       | 0.00       | 0.00       | 0.00       | 0.00       | 0.00       | 0.00       | 0.00       |
| Nitzschia stellata [%]                           | 0.00       | 0.00       | 0.00       | 0.00       | 0.00       | 0.00       | 0.00       | 0.00       | 0.00       | 0.00       | 0.00       |
| N. taenniformis [%]                              | 0.43       | 0.00       | 0.00       | 0.00       | 0.00       | 0.00       | 0.00       | 0.00       | 0.21       | 0.00       | 0.18       |
| Odontella weissflogii [%]                        | 0.86       | 0.41       | 0.53       | 0.51       | 1.19       | 0.00       | 1.15       | 0.17       | 0.43       | 0.20       | 0.37       |
| Porosira glacialis [%]                           | 0.22       | 0.21       | 0.00       | 0.17       | 0.20       | 0.00       | 0.00       | 0.00       | 0.00       | 0.00       | 0.00       |
| Porosira pseudodenticulata [%]                   | 0.00       | 0.00       | 0.18       | 0.17       | 0.00       | 0.20       | 0.00       | 0.00       | 0.00       | 0.00       | 0.00       |
| Porosira spp. [%]                                | 0.22       | 0.00       | 0.18       | 0.00       | 0.00       | 0.00       | 0.00       | 0.00       | 0.43       | 0.00       | 0.00       |
| Stellarima microtrias (rs and veg) [%]           | 0.00       | 0.21       | 0.53       | 0.17       | 0.00       | 0.00       | 0.16       | 0.00       | 0.00       | 0.00       | 0.18       |
| Synedropsis laevis [%]                           | 0.00       | 0.21       | 0.00       | 0.00       | 0.00       | 0.00       | 0.00       | 0.00       | 0.00       | 0.00       | 0.00       |
| Synedropsis recta [%]                            | 0.43       | 0.00       | 0.00       | 0.00       | 0.00       | 0.20       | 0.33       | 0.00       | 0.00       | 0.00       | 0.18       |
| Synedra/Synedropsis spp. [%]                     | 0.00       | 0.00       | 0.00       | 0.00       | 0.00       | 0.00       | 0.00       | 0.00       | 0.00       | 0.00       | 0.00       |
| Synedropsis sp. [%]                              | 0.00       | 0.00       | 0.00       | 0.00       | 0.00       | 0.00       | 0.00       | 0.00       | 0.00       | 0.00       | 0.00       |
| Thalassiosira antarctica (T1-cold) [%]           | 0.00       | 0.00       | 0.00       | 0.00       | 0.00       | 0.00       | 0.16       | 0.17       | 0.00       | 0.00       | 0.00       |
| Asteromphalus hookeri [%]                        | 0.00       | 0.00       | 0.00       | 0.00       | 0.00       | 0.00       | 0.00       | 0.00       | 0.00       | 0.20       | 0.00       |
| Asteromphalus hyalinus [%]                       | 0.00       | 0.00       | 0.00       | 0.00       | 0.00       | 0.00       | 0.16       | 0.00       | 0.00       | 0.00       | 0.18       |
| Eucampia antarctica var. antarctica [%]          | 0.00       | 0.00       | 0.00       | 0.00       | 0.00       | 0.00       | 0.16       | 0.00       | 0.00       | 0.00       | 0.00       |
| Fragilariopsis pseudonana [%]                    | 0.00       | 0.00       | 0.00       | 0.00       | 0.00       | 0.00       | 0.00       | 0.00       | 0.21       | 0.00       | 0.00       |
| Fragilariopsis separanda [%]                     | 0.00       | 0.00       | 0.18       | 0.00       | 0.00       | 0.00       | 0.16       | 0.00       | 0.21       | 0.00       | 0.55       |
| Proboscia inermis (winter) [%]                   | 1.51       | 0.00       | 0.71       | 0.34       | 0.00       | 0.00       | 0.33       | 0.00       | 0.00       | 0.00       | 0.00       |
| Proboscia inermis (spring) [%]                   | 0.00       | 0.00       | 0.00       | 0.00       | 0.00       | 0.00       | 0.49       | 0.00       | 0.00       | 0.00       | 0.00       |
| Proboscia alata [%]                              | 0.00       | 0.00       | 0.18       | 0.17       | 0.00       | 0.00       | 0.00       | 0.00       | 0.00       | 0.00       | 0.00       |
| Proboscia spp. [%]                               | 0.00       | 0.00       | 0.00       | 0.00       | 0.00       | 0.00       | 0.00       | 0.70       | 0.00       | 0.00       | 0.00       |
| Pseudo-nitzschia turgiduloides [%]               | 0.22       | 0.00       | 0.18       | 0.34       | 0.00       | 0.00       | 0.16       | 0.00       | 0.00       | 0.00       | 0.00       |
| Rhizosolenia antennata f. antennata [%]          | 0.00       | 0.00       | 0.00       | 0.00       | 0.00       | 0.00       | 0.00       | 0.00       | 0.00       | 0.00       | 0.00       |
| R. antennata f. semispina [%]                    | 0.43       | 0.41       | 0.89       | 0.17       | 0.00       | 0.00       | 0.66       | 0.17       | 0.64       | 0.00       | 0.00       |
| R. polydactyla f. polydactyla [%]                | 0.00       | 0.00       | 0.00       | 0.00       | 0.00       | 0.00       | 0.00       | 0.00       | 0.00       | 0.00       | 0.00       |
| R. simplex [%]                                   | 0.00       | 0.00       | 1.06       | 0.00       | 0.00       | 0.00       | 0.00       | 0.00       | 0.00       | 0.00       | 0.00       |
| Shionodiscus gracilis var. expectus [%]          | 0.86       | 0.62       | 0.89       | 0.00       | 0.40       | 0.20       | 0.49       | 2.44       | 0.85       | 0.41       | 0.37       |
| Shionodiscus gracilis var. gracilis [%]          | 0.86       | 0.41       | 0.89       | 0.17       | 0.40       | 0.20       | 1.31       | 0.00       | 0.64       | 0.61       | 0.55       |
| Shionodiscus frenguelliopsis [%]                 | 0.65       | 0.41       | 0.35       | 0.17       | 0.40       | 0.00       | 0.33       | 0.00       | 1.28       | 0.00       | 0.37       |
| Thalassiosira antarctica (veg+RS) [%]            | 2.59       | 2.28       | 2.84       | 0.51       | 1.98       | 2.65       | 4.76       | 3.31       | 3.40       | 1.23       | 3.67       |
| Thalassiosira gravida [%]                        | 0.00       | 0.00       | 0.00       | 0.00       | 0.20       | 0.00       | 0.00       | 0.00       | 0.00       | 0.00       | 0.00       |
| Thalassiosira lentiginosa [%]                    | 0.65       | 0.41       | 0.18       | 0.00       | 0.00       | 0.61       | 0.49       | 0.17       | 0.43       | 0.00       | 0.18       |
| Thalassiosira maculata [%]                       | 0.00       | 0.00       | 0.00       | 0.00       | 0.00       | 0.00       | 0.00       | 0.00       | 0.00       | 0.00       | 0.00       |
| Thalassiosira oliverana [%]                      | 0.00       | 0.00       | 0.00       | 0.00       | 0.00       | 0.00       | 0.00       | 0.00       | 0.00       | 0.00       | 0.00       |
| Thalassiosira ritscheri [%]                      | 0.00       | 0.00       | 0.00       | 0.00       | 0.00       | 0.00       | 0.00       | 0.35       | 0.00       | 0.41       | 0.00       |
| Thalassiosira scotia [%]                         | 0.00       | 0.00       | 0.35       | 0.00       | 0.00       | 0.00       | 0.33       | 0.00       | 0.43       | 0.20       | 0.18       |
| Thalassiosira antarctica/scotia [%]              | 0.00       | 1.45       | 0.89       | 0.00       | 0.20       | 0.00       | 0.16       | 0.00       | 0.43       | 0.00       | 0.00       |
| Thalassiosira tumida [%]                         | 0.43       | 0.00       | 0.00       | 0.00       | 0.00       | 0.00       | 0.49       | 0.00       | 0.00       | 0.00       | 0.00       |
| Thalassiothrix antarctica [%]                    | 0.00       | 0.21       | 0.00       | 0.00       | 0.00       | 0.00       | 0.49       | 0.00       | 0.00       | 0.00       | 0.18       |
| Trichotoxon reinboldii [%]                       | 0.22       | 0.00       | 0.18       | 0.00       | 0.20       | 0.00       | 0.00       | 0.17       | 0.00       | 0.00       | 0.00       |
| Azpeitia tabularis [%]                           | 0.00       | 0.00       | 0.00       | 0.00       | 0.00       | 0.00       | 0.00       | 0.00       | 0.00       | 0.00       | 0.00       |
| Coscinodiscus aculus-irridis [%]                 | 0.00       | 0.00       | 0.00       | 0.00       | 0.00       | 0.00       | 0.00       | 0.00       | 0.00       | 0.00       | 0.00       |
| Fragilariopsis kerguelensis [%]                  | 0.65       | 1.86       | 0.35       | 0.34       | 0.00       | 0.61       | 1.64       | 1.22       | 0.43       | 1.02       | 1.65       |
| Nitzschia bicipitata [%]                         | 0.00       | 0.00       | 0.00       | 0.00       | 0.00       | 0.00       | 0.00       | 0.00       | 0.00       | 0.00       | 0.00       |
| Shionodiscus oestrupii [%]                       | 0.00       | 0.00       | 0.00       | 0.00       | 0.00       | 0.00       | 0.00       | 0.00       | 0.00       | 0.00       | 0.00       |
| Stephanopyxis turris [%]                         | 0.00       | 0.00       | 0.00       | 0.00       | 0.00       | 0.00       | 0.00       | 0.00       | 0.00       | 0.00       | 0.00       |
| Actinocyclus ingens [%]                          | 0.00       | 0.00       | 0.00       | 0.00       | 0.00       | 0.00       | 0.00       | 0.00       | 0.00       | 0.00       | 0.00       |
| Cladogramma sp. [%]                              | 0.00       | 0.00       | 0.00       | 0.00       | 0.00       | 0.00       | 0.00       | 0.00       | 0.00       | 0.00       | 0.00       |
| Rouxia constricta [%]                            | 0.00       | 0.00       | 0.00       | 0.00       | 0.00       | 0.00       | 0.00       | 0.00       | 0.00       | 0.00       | 0.00       |
| Rouxia leventerae [%]                            | 0.00       | 0.00       | 0.00       | 0.00       | 0.00       | 0.00       | 0.00       | 0.00       | 0.00       | 0.00       | 0.00       |
| Unidentified taxa [%]                            | 0.65       | 0.41       | 0.00       | 0.00       | 0.00       | 0.00       | 1.97       | 0.00       | 0.64       | 0.00       | 0.73       |
| Chaetoceros resting spores [%]                   | 85.96      | 87.58      | 86.17      | 93.71      | 91.49      | 93.67      | 77.83      | 87.11      | 85.11      | 93.24      | 85.69      |
| Total [%]                                        | 100.00     | 100.00     | 100.00     | 100.00     | 100.00     | 100.00     | 100.00     | 100.00     | 100.00     | 100.00     | 100.00     |
| diatom counted                                   | 463        | 483        | 564        | 589        | 505        | 490        | 609        | 574        | 470        | 488        | 545        |
| Diatom concentration [valves/g]                  | 1.97E+08   | 1.35E+08   | 1.23E+08   | 1.63E+08   | 1.78E+08   | 1.61E+08   | 5.78E+07   | 5.93E+07   | 1.28E+08   | 1.76E+08   | 1.40E+08   |
| seasonal sea-ice assemblage [% without CRS]      | 29.76      | 31.58      | 26.00      | 48.96      | 41.08      | 33.94      | 27.75      | 29.28      | 36.93      | 34.99      | 31.51      |
| open ocean cold assemblage [% without CRS]       | 56.46      | 46.00      | 62.00      | 36.67      | 44.25      | 51.36      | 50.96      | 57.98      | 50.90      | 43.40      | 46.40      |
| open ocn warm assemblage [% without CRS]         | 8.75       | 12.36      | 8.00       | 5.63       | 8.31       | 10.18      | 12.68      | 7.60       | 5.99       | 15.30      | 13.90      |
| fossil species [% without CRS]                   | 0.00       | 0.00       | 0.00       | 0.00       | 0.00       | 0.23       | 0.00       | 0.00       | 0.20       | 0.00       | 0.00       |
| benthic and epiphytic assemblage [% without CRS] | 2.41       | 4.58       | 2.25       | 2.08       | 3.91       | 1.81       | 3.83       | 4.18       | 3.39       | 3.82       | 3.47       |
| Diatom concentration [valve/g without CRS]       | 2.04E+07   | 1.95E+07   | 1.60E+07   | 1.14E+07   | 1.78E+07   | 1.49E+07   | 1.98E+07   | 1.11E+07   | 1.46E+07   | 1.29E+07   | 1.73E+07   |

| Event                                            | PS97/072-1 | PS97/072-1 | PS97/072-1 | PS97/072-1 | PS97/072-1 | PS97/072-1 | PS97/072-1 | PS97/072-1 | PS97/072-1 | PS97/072-1 | PS97/072-1 |
|--------------------------------------------------|------------|------------|------------|------------|------------|------------|------------|------------|------------|------------|------------|
| Depth [m]                                        | 3.20       | 3.48       | 3.60       | 4.00       | 4.20       | 4.40       | 4.64       | 4.80       | 5.04       | 5.20       | 5.40       |
| Achnanthes brevipes [%]                          | 0.00       | 0.00       | 0.00       | 0.00       | 0.00       | 0.00       | 0.00       | 0.00       | 0.00       | 0.00       | 0.00       |
| Amphora copulata [%]                             | 0.00       | 0.00       | 0.00       | 0.00       | 0.00       | 0.00       | 0.00       | 0.00       | 0.00       | 0.00       | 0.00       |
| Amphora coffeaeformis [%]                        | 0.00       | 0.00       | 0.00       | 0.00       | 0.00       | 0.00       | 0.00       | 0.00       | 0.00       | 0.00       | 0.00       |
| Cocconeis costata [%]                            | 0.00       | 0.00       | 0.00       | 0.18       | 0.00       | 0.00       | 0.00       | 0.00       | 0.00       | 0.00       | 0.00       |
| Cocconeis dalmannii [%]                          | 0.00       | 0.00       | 0.00       | 0.00       | 0.00       | 0.00       | 0.00       | 0.00       | 0.00       | 0.00       | 0.00       |
| Cocconeis fasciolata [%]                         | 0.00       | 0.17       | 0.00       | 0.00       | 0.00       | 0.00       | 0.00       | 0.00       | 0.00       | 0.00       | 0.00       |
| Cocconeis californica var californica [%]        | 0.00       | 0.00       | 0.00       | 0.00       | 0.00       | 0.00       | 0.00       | 0.00       | 0.00       | 0.00       | 0.00       |
| Cocconeis californica var. kerguelensis [%]      | 0.00       | 0.00       | 0.00       | 0.00       | 0.00       | 0.00       | 0.00       | 0.00       | 0.00       | 0.00       | 0.00       |
| Cocconeis melchioroides [%]                      | 0.00       | 0.00       | 0.00       | 0.00       | 0.00       | 0.00       | 0.00       | 0.00       | 0.18       | 0.00       | 0.19       |
| Cocconeis imperatrix [%]                         | 0.00       | 0.00       | 0.00       | 0.18       | 0.00       | 0.00       | 0.00       | 0.00       | 0.00       | 0.00       | 0.00       |
| Cocconeis sp. 1 [%]                              | 0.00       | 0.00       | 0.00       | 0.00       | 0.00       | 0.00       | 0.00       | 0.00       | 0.00       | 0.00       | 0.00       |
| Cocconeis sp. 2 [%]                              | 0.00       | 0.00       | 0.00       | 0.00       | 0.00       | 0.00       | 0.00       | 0.00       | 0.00       | 0.00       | 0.00       |
| Entopilla ocellata [%]                           | 0.00       | 0.00       | 0.00       | 0.00       | 0.00       | 0.00       | 0.00       | 0.00       | 0.00       | 0.00       | 0.00       |
| Fallacia marnieri [%]                            | 0.00       | 0.00       | 0.00       | 0.00       | 0.00       | 0.00       | 0.00       | 0.00       | 0.00       | 0.00       | 0.00       |
| Gomphomenopsis littoralis [%]                    | 0.19       | 0.00       | 0.00       | 0.00       | 0.00       | 0.00       | 0.00       | 0.00       | 0.00       | 0.00       | 0.00       |
| Grammatophora angulosa [%]                       | 0.00       | 0.00       | 0.00       | 0.00       | 0.00       | 0.00       | 0.00       | 0.00       | 0.00       | 0.00       | 0.00       |
| Licmophora gracilis [%]                          | 0.00       | 0.00       | 0.00       | 0.00       | 0.00       | 0.00       | 0.00       | 0.00       | 0.00       | 0.00       | 0.00       |
| Melosira adeliae [%]                             | 0.00       | 0.00       | 0.00       | 0.00       | 0.00       | 0.00       | 0.00       | 0.00       | 0.00       | 0.00       | 0.00       |
| Navicula directa [%]                             | 0.00       | 0.17       | 0.00       | 0.00       | 0.00       | 0.00       | 0.00       | 0.00       | 0.00       | 0.18       | 0.00       |
| Navicula glaciei [%]                             | 0.00       | 0.00       | 0.00       | 0.18       | 0.00       | 0.00       | 0.00       | 0.00       | 0.00       | 0.00       | 0.00       |
| Navicula imperfecta [%]                          | 0.00       | 0.00       | 0.00       | 0.00       | 0.00       | 0.00       | 0.00       | 0.00       | 0.00       | 0.00       | 0.00       |
| Navicula perminuta [%]                           | 0.00       | 0.34       | 0.00       | 0.00       | 0.19       | 0.00       | 0.00       | 0.19       | 0.00       | 0.09       | 0.00       |
| Paralia sulcata [%]                              | 0.00       | 0.00       | 0.00       | 0.00       | 0.00       | 0.00       | 0.00       | 0.00       | 0.00       | 0.00       | 0.00       |
| Planothidium vicentii [%]                        | 0.19       | 0.00       | 0.00       | 0.00       | 0.00       | 0.00       | 0.00       | 0.00       | 0.00       | 0.00       | 0.00       |
| Pseudogomphonema kantschaticum [%]               | 0.00       | 0.00       | 0.00       | 0.00       | 0.00       | 0.00       | 0.00       | 0.00       | 0.00       | 0.00       | 0.00       |
| Actinocyclus actinochilus [%]                    | 0.75       | 1.02       | 0.44       | 0.55       | 0.56       | 0.00       | 0.00       | 0.19       | 0.00       | 0.09       | 0.19       |
| Berkeleya spp. [%]                               | 0.00       | 0.00       | 0.00       | 0.00       | 0.00       | 0.00       | 0.00       | 0.00       | 0.00       | 0.00       | 0.00       |
| Corethron pennatum [%]                           | 0.19       | 1.02       | 0.00       | 0.00       | 0.38       | 0.00       | 0.23       | 0.00       | 0.18       | 0.09       | 0.19       |
| Eucampia antarctica var. recta [%]               | 0.19       | 0.00       | 0.00       | 0.91       | 0.38       | 0.48       | 0.46       | 0.57       | 0.74       | 1.81       | 1.70       |
| Fragilariopsis curta [%]                         | 1.32       | 3.41       | 2.20       | 0.73       | 1.50       | 1.12       | 1.62       | 1.15       | 1.29       | 1.08       | 1.51       |
| Fragilariopsis cylindrus [%]                     | 0.19       | 0.68       | 0.44       | 0.91       | 0.56       | 0.16       | 0.00       | 0.00       | 0.18       | 0.18       | 0.38       |
| Fragilariopsis nana [%]                          | 0.00       | 0.00       | 0.00       | 0.00       | 0.00       | 0.00       | 0.00       | 0.00       | 0.00       | 0.00       | 0.00       |
| Fragilariopsis obliquecostata [%]                | 0.00       | 0.00       | 0.44       | 0.18       | 0.00       | 0.00       | 0.00       | 0.00       | 0.00       | 0.18       | 0.00       |
| Fragilariopsis peragallii [%]                    | 0.00       | 0.00       | 0.00       | 0.00       | 0.00       | 0.00       | 0.23       | 0.00       | 0.18       | 0.00       | 0.00       |
| Fragilariopsis rhombica [%]                      | 0.38       | 0.68       | 0.66       | 0.36       | 0.00       | 0.00       | 0.00       | 0.00       | 0.00       | 0.45       | 0.95       |
| Fragilariopsis ritscheri [%]                     | 0.00       | 0.00       | 0.00       | 0.00       | 0.00       | 0.00       | 0.00       | 0.57       | 0.00       | 0.09       | 0.00       |
| Fragilariopsis sublinearis [%]                   | 0.19       | 0.00       | 0.00       | 0.00       | 0.00       | 0.16       | 0.23       | 0.00       | 0.00       | 0.00       | 0.19       |
| Fragilariopsis sublin/obliq [%]                  | 0.00       | 0.00       | 0.00       | 0.00       | 0.00       | 0.00       | 0.00       | 0.00       | 0.00       | 0.00       | 0.00       |
| Fragilariopsis vanheurckii [%]                   | 0.19       | 0.17       | 0.22       | 0.18       | 0.19       | 0.00       | 0.00       | 0.19       | 0.00       | 0.27       | 0.00       |
| Neodenticula seminae [%]                         | 0.00       | 0.00       | 0.00       | 0.00       | 0.00       | 0.00       | 0.00       | 0.00       | 0.00       | 0.00       | 0.00       |
| Nitzschia stellata [%]                           | 0.00       | 0.00       | 0.00       | 0.00       | 0.00       | 0.00       | 0.00       | 0.00       | 0.00       | 0.00       | 0.00       |
| N. taeniiiformis [%]                             | 0.00       | 0.00       | 0.44       | 0.00       | 0.09       | 0.00       | 0.23       | 0.00       | 0.00       | 0.00       | 0.00       |
| Odontella weissflogii [%]                        | 0.00       | 0.34       | 0.00       | 0.36       | 0.94       | 0.00       | 0.23       | 0.00       | 0.55       | 0.81       | 0.19       |
| Porosira glacialis [%]                           | 0.00       | 0.00       | 0.00       | 0.00       | 0.19       | 0.00       | 0.23       | 0.19       | 0.00       | 0.00       | 0.00       |
| Porosira pseudodenticulata [%]                   | 0.00       | 0.34       | 0.00       | 0.00       | 0.19       | 0.48       | 0.23       | 0.00       | 0.00       | 0.09       | 0.19       |
| Porosira spp. [%]                                | 0.00       | 0.00       | 0.00       | 0.00       | 0.00       | 0.00       | 0.00       | 0.00       | 0.55       | 0.36       | 0.00       |
| Stellarima microtrias (rs and veg) [%]           | 0.00       | 0.34       | 0.00       | 0.00       | 0.56       | 0.00       | 0.00       | 0.00       | 0.00       | 0.27       | 0.19       |
| Synedropsis laevis [%]                           | 0.00       | 0.00       | 0.00       | 0.00       | 0.00       | 0.00       | 0.00       | 0.00       | 0.00       | 0.00       | 0.00       |
| Synedropsis recta [%]                            | 0.19       | 0.34       | 0.00       | 0.00       | 0.00       | 0.00       | 0.00       | 0.00       | 0.00       | 0.00       | 0.00       |
| Synedra/Synedropsis spp. [%]                     | 0.00       | 0.00       | 0.00       | 0.00       | 0.00       | 0.00       | 0.00       | 0.00       | 0.00       | 0.00       | 0.00       |
| Synedropsis sp. [%]                              | 0.00       | 0.00       | 0.00       | 0.18       | 0.00       | 0.00       | 0.00       | 0.00       | 0.00       | 0.00       | 0.00       |
| Thalassiosira antarctica (T1-cold) [%]           | 0.38       | 0.85       | 0.00       | 0.00       | 0.38       | 0.00       | 0.00       | 0.19       | 0.18       | 0.00       | 0.00       |
| Asteromphalus hookeri [%]                        | 0.00       | 0.00       | 0.00       | 0.00       | 0.00       | 0.00       | 0.00       | 0.00       | 0.00       | 0.09       | 0.00       |
| Asteromphalus hyalinus [%]                       | 0.00       | 0.17       | 0.00       | 0.00       | 0.38       | 0.00       | 0.00       | 0.00       | 0.00       | 0.00       | 0.00       |
| Eucampia antarctica var. antarctica [%]          | 0.00       | 0.17       | 0.00       | 1.64       | 1.88       | 0.64       | 1.15       | 0.38       | 0.74       | 1.63       | 0.95       |
| Fragilariopsis pseudonana [%]                    | 0.00       | 0.00       | 0.00       | 0.00       | 0.00       | 0.00       | 0.00       | 0.00       | 0.00       | 0.00       | 0.00       |
| Fragilariopsis separanda [%]                     | 0.19       | 0.00       | 0.22       | 0.00       | 0.00       | 0.00       | 0.00       | 0.00       | 0.00       | 0.09       | 0.00       |
| Proboscia inermis (winter) [%]                   | 2.07       | 0.68       | 0.00       | 0.00       | 0.19       | 0.00       | 0.46       | 0.00       | 0.18       | 0.09       | 0.00       |
| Proboscia inermis (spring) [%]                   | 0.94       | 0.34       | 0.00       | 0.00       | 0.00       | 0.00       | 0.00       | 0.00       | 0.37       | 0.00       | 0.00       |
| Proboscia alata [%]                              | 1.13       | 0.00       | 0.00       | 0.00       | 0.00       | 0.00       | 0.00       | 0.00       | 0.00       | 0.00       | 0.00       |
| Proboscia spp. [%]                               | 0.00       | 0.00       | 0.88       | 0.00       | 0.00       | 1.44       | 0.00       | 0.00       | 0.00       | 0.00       | 0.19       |
| Pseudo-nitzschia turgiduloides [%]               | 0.19       | 0.17       | 0.00       | 0.00       | 0.09       | 0.00       | 0.00       | 0.00       | 0.18       | 0.09       | 0.00       |
| Rhizosolenia antennata f. antennata [%]          | 0.00       | 0.00       | 0.00       | 0.00       | 0.00       | 0.00       | 0.00       | 0.00       | 0.00       | 0.00       | 0.00       |
| R. antennata f. semispina [%]                    | 0.56       | 0.85       | 0.22       | 0.00       | 0.19       | 1.60       | 1.85       | 0.00       | 0.37       | 0.09       | 0.19       |
| R. polydactyla f. polydactyla [%]                | 0.00       | 0.00       | 0.00       | 0.00       | 0.00       | 0.00       | 0.00       | 0.00       | 0.00       | 0.00       | 0.00       |
| R. simplex [%]                                   | 0.00       | 0.00       | 0.00       | 0.18       | 0.00       | 0.16       | 1.39       | 0.00       | 0.00       | 0.09       | 0.00       |
| Shionodiscus gracilis var. expectus [%]          | 1.50       | 1.19       | 0.44       | 0.00       | 0.38       | 0.16       | 0.23       | 0.57       | 0.55       | 0.00       | 0.76       |
| Shionodiscus gracilis var. gracilis [%]          | 0.38       | 1.19       | 0.44       | 0.55       | 0.19       | 0.32       | 0.23       | 0.38       | 0.00       | 0.90       | 0.95       |
| Shionodiscus frenguelliopsis [%]                 | 0.56       | 0.00       | 0.00       | 0.18       | 0.38       | 0.00       | 0.00       | 0.00       | 0.00       | 0.09       | 0.00       |
| Thalassiosira antarctica (veg+RS) [%]            | 1.32       | 7.67       | 1.10       | 1.64       | 0.94       | 1.28       | 2.77       | 0.76       | 2.40       | 3.89       | 7.75       |
| Thalassiosira gravida [%]                        | 0.00       | 0.34       | 0.00       | 0.00       | 0.19       | 0.00       | 0.00       | 0.00       | 0.18       | 0.00       | 0.00       |
| Thalassiosira lentiginosa [%]                    | 0.56       | 0.34       | 0.00       | 0.00       | 0.38       | 0.00       | 0.23       | 0.19       | 0.37       | 0.18       | 0.00       |
| Thalassiosira maculata [%]                       | 0.00       | 1.70       | 0.44       | 0.00       | 0.00       | 0.00       | 0.00       | 0.19       | 0.00       | 0.00       | 0.00       |
| Thalassiosira oliverana [%]                      | 0.00       | 0.00       | 0.00       | 0.00       | 0.00       | 0.00       | 0.00       | 0.00       | 0.00       | 0.00       | 0.00       |
| Thalassiosira ritscheri [%]                      | 0.00       | 0.00       | 0.22       | 0.00       | 0.00       | 0.16       | 0.00       | 0.00       | 0.00       | 0.00       | 0.38       |
| Thalassiosira scotia [%]                         | 0.00       | 0.00       | 0.22       | 0.00       | 0.19       | 0.00       | 0.69       | 0.19       | 0.18       | 0.00       | 0.19       |
| Thalassiosira antarctica/scotia [%]              | 0.00       | 0.00       | 0.66       | 0.00       | 0.00       | 0.00       | 0.00       | 0.00       | 0.00       | 0.18       | 0.00       |
| Thalassiosira tumida [%]                         | 0.00       | 0.00       | 0.00       | 0.00       | 0.00       | 0.00       | 0.00       | 0.00       | 0.00       | 0.00       | 0.38       |
| Thalassiothrix antarctica [%]                    | 0.00       | 0.00       | 0.00       | 0.00       | 0.09       | 0.00       | 0.23       | 0.00       | 0.18       | 0.18       | 0.00       |
| Trichotoxon reinboldii [%]                       | 0.00       | 0.00       | 0.00       | 0.00       | 0.09       | 0.16       | 0.23       | 0.00       | 0.09       | 0.00       | 0.19       |
| Azpeitia tabularis [%]                           | 0.00       | 0.00       | 0.00       | 0.00       | 0.00       | 0.00       | 0.00       | 0.00       | 0.00       | 0.00       | 0.00       |
| Coscinodiscus aculus-irridis [%]                 | 0.00       | 0.00       | 0.00       | 0.00       | 0.19       | 0.00       | 0.00       | 0.00       | 0.18       | 0.00       | 0.00       |
| Fragilariopsis kerguelensis [%]                  | 2.26       | 3.75       | 1.76       | 1.28       | 0.94       | 0.96       | 1.85       | 2.48       | 1.11       | 1.36       | 1.51       |
| Nitzschia bicipitata [%]                         | 0.00       | 0.00       | 0.00       | 0.00       | 0.00       | 0.00       | 0.00       | 0.00       | 0.00       | 0.00       | 0.00       |
| Shionodiscus oestrupii [%]                       | 0.00       | 0.17       | 0.00       | 0.00       | 0.00       | 0.00       | 0.00       | 0.00       | 0.00       | 0.00       | 0.00       |
| Stephanopyxis turris [%]                         | 0.19       | 0.00       | 0.00       | 0.00       | 0.00       | 0.00       | 0.00       | 0.00       | 0.00       | 0.09       | 0.00       |
| Actinocyclus ingens [%]                          | 0.00       | 0.00       | 0.00       | 0.00       | 0.00       | 0.00       | 0.00       | 0.00       | 0.00       | 0.00       | 0.00       |
| Cladogramma sp. [%]                              | 0.00       | 0.00       | 0.00       | 0.00       | 0.00       | 0.00       | 0.00       | 0.00       | 0.00       | 0.00       | 0.00       |
| Rouxia constricta [%]                            | 0.00       | 0.00       | 0.00       | 0.00       | 0.00       | 0.00       | 0.00       | 0.00       | 0.00       | 0.00       | 0.00       |
| Rouxia leventerae [%]                            | 0.00       | 0.00       | 0.00       | 0.00       | 0.00       | 0.00       | 0.00       | 0.00       | 0.00       | 0.00       | 0.00       |
| Unidentified taxa [%]                            | 0.94       | 0.85       | 1.32       | 0.55       | 1.31       | 1.12       | 1.39       | 0.57       | 2.22       | 0.45       | 2.27       |
| Chaetoceros resting spores [%]                   | 82.89      | 70.53      | 87.25      | 89.05      | 85.93      | 89.62      | 83.60      | 91.03      | 86.61      | 84.45      | 78.45      |
| Total [%]                                        | 100.00     | 100.00     | 100.00     | 100.00     | 100.00     | 100.00     | 100.00     | 100.00     | 100.00     | 100.00     | 100.00     |
| diatom counted                                   | 532        | 587        | 455        | 548        | 533        | 524        | 433        | 549        | 542        | 1106       | 529        |
| Diatom concentration [valves/g]                  | 1.63E+08   | 7.52E+07   | 1.48E+08   | 1.51E+08   | 1.06E+08   | 3.14E+08   | 1.18E+08   | 1.71E+08   | 1.79E+08   | 1.11E+08   | 2.88E+07   |
| seasonal sea-ice assemblage [% without CRS]      | 26.03      | 27.37      | 36.32      | 36.06      | 38.89      | 29.95      | 22.54      | 40.51      | 26.20      | 32.38      | 30.51      |
| open ocean cold assemblage [% without CRS]       | 55.06      | 55.35      | 44.17      | 45.22      | 38.89      | 54.26      | 51.56      | 33.58      | 48.23      | 55.24      | 52.54      |
| open ocn warm assemblage [% without CRS]         | 11.99      | 12.35      | 13.68      | 11.95      | 8.85       | 10.53      | 13.67      | 21.17      | 10.19      | 8.95       | 11.23      |
| fossil species [% without CRS]                   | 0.00       | 0.00       | 0.00       | 0.00       | 0.00       | 0.00       | 0.00       | 0.00       | 0.00       | 0.00       | 0.00       |
| benthic and epiphytic assemblage [% without CRS] | 3.75       | 2.26       | 2.24       | 2.99       | 1.44       | 0.00       | 1.20       | 0.36       | 0.62       | 0.95       | 1.69       |
| Diatom concentration [valve/g without CRS]       | 2.32E+07   | 2.00E+07   | 2.31E+07   | 1.73E+07   | 2.46E+07   | 3.31E+07   | 1.19E+07   | 3.97E+07   | 3.03E+07   | 1.75E+07   | 1.02E+07   |

| Event                                            | PS97/072-1 | PS97/072-1 | PS97/072-1 | PS97/072-1 | PS97/072-1 | PS97/072-1 | PS97/072-1 | PS97/072-1 | PS97/072-1 | PS97/072-1 | PS97/072-1 |
|--------------------------------------------------|------------|------------|------------|------------|------------|------------|------------|------------|------------|------------|------------|
| Depth [m]                                        | 5.44       | 5.52       | 5.60       | 5.68       | 5.84       | 6.00       | 6.52       | 6.76       | 6.90       | 6.98       | 7.10       |
| Achnanthes brevipes [%]                          | 0.00       | 0.00       | 0.00       | 0.00       | 0.00       | 0.00       | 0.00       | 0.00       | 0.00       | 0.00       | 0.00       |
| Amphora copulata [%]                             | 0.00       | 0.00       | 0.00       | 0.00       | 0.00       | 0.00       | 0.00       | 0.00       | 0.00       | 0.00       | 0.00       |
| Amphora coffaeaeformis [%]                       | 0.00       | 0.00       | 0.00       | 0.00       | 0.00       | 0.00       | 0.00       | 0.00       | 0.00       | 0.00       | 0.00       |
| Cocconeis costata [%]                            | 0.00       | 0.00       | 0.00       | 0.00       | 0.23       | 0.22       | 0.00       | 0.00       | 0.00       | 0.00       | 0.00       |
| Cocconeis dalmannii [%]                          | 0.00       | 0.00       | 0.00       | 0.00       | 0.00       | 0.00       | 0.00       | 0.00       | 0.00       | 0.00       | 0.00       |
| Cocconeis fasciolata [%]                         | 0.00       | 0.00       | 0.00       | 0.00       | 0.00       | 0.00       | 0.00       | 0.16       | 0.00       | 0.00       | 0.00       |
| Cocconeis californica var. californica [%]       | 0.00       | 0.18       | 0.00       | 0.00       | 0.00       | 0.00       | 0.00       | 0.00       | 0.24       | 0.00       | 0.00       |
| Cocconeis californica var. kerguelensis [%]      | 0.00       | 0.00       | 0.00       | 0.00       | 0.00       | 0.22       | 0.00       | 0.00       | 0.00       | 0.00       | 0.00       |
| Cocconeis melchioroides [%]                      | 0.00       | 0.00       | 0.00       | 0.00       | 0.00       | 0.00       | 0.00       | 0.00       | 0.00       | 0.17       | 0.14       |
| Cocconeis imperatrix [%]                         | 0.00       | 0.00       | 0.00       | 0.14       | 0.00       | 0.00       | 0.00       | 0.00       | 0.00       | 0.00       | 0.00       |
| Cocconeis sp. 1 [%]                              | 0.00       | 0.00       | 0.00       | 0.00       | 0.00       | 0.00       | 0.00       | 0.00       | 0.00       | 0.00       | 0.00       |
| Cocconeis sp. 2 [%]                              | 0.00       | 0.00       | 0.00       | 0.00       | 0.00       | 0.00       | 0.00       | 0.00       | 0.00       | 0.00       | 0.00       |
| Entopilla ocellata [%]                           | 0.00       | 0.00       | 0.00       | 0.00       | 0.00       | 0.00       | 0.00       | 0.00       | 0.00       | 0.00       | 0.00       |
| Fallacia marnieri [%]                            | 0.00       | 0.00       | 0.00       | 0.00       | 0.00       | 0.00       | 0.00       | 0.00       | 0.00       | 0.00       | 0.00       |
| Gomphomenopsis littoralis [%]                    | 0.00       | 0.18       | 0.00       | 0.14       | 0.00       | 0.22       | 0.00       | 0.00       | 0.00       | 0.00       | 0.00       |
| Grammatophora angulosa [%]                       | 0.00       | 0.00       | 0.00       | 0.00       | 0.00       | 0.00       | 0.00       | 0.00       | 0.00       | 0.00       | 0.00       |
| Licmophora gracilis [%]                          | 0.00       | 0.00       | 0.00       | 0.00       | 0.00       | 0.00       | 0.00       | 0.00       | 0.00       | 0.00       | 0.00       |
| Melosira adeliae [%]                             | 0.00       | 0.00       | 0.00       | 0.00       | 0.00       | 0.00       | 0.00       | 0.00       | 0.00       | 0.00       | 0.00       |
| Navicula directa [%]                             | 0.20       | 0.18       | 0.00       | 0.14       | 0.00       | 0.22       | 0.00       | 0.00       | 0.00       | 0.00       | 0.00       |
| Navicula glaciei [%]                             | 0.00       | 0.00       | 0.00       | 0.00       | 0.00       | 0.00       | 0.00       | 0.00       | 0.24       | 0.00       | 0.00       |
| Navicula imperfecta [%]                          | 0.00       | 0.00       | 0.00       | 0.00       | 0.00       | 0.00       | 0.00       | 0.00       | 0.00       | 0.00       | 0.00       |
| Navicula perminuta [%]                           | 0.00       | 0.00       | 0.00       | 0.00       | 0.00       | 0.22       | 0.00       | 0.00       | 0.00       | 0.00       | 0.00       |
| Paralia sulcata [%]                              | 0.00       | 0.00       | 0.00       | 0.00       | 0.00       | 0.00       | 0.00       | 0.00       | 0.00       | 0.00       | 0.00       |
| Planothidium vicentii [%]                        | 0.00       | 0.00       | 0.00       | 0.00       | 0.00       | 0.00       | 0.00       | 0.00       | 0.00       | 0.00       | 0.00       |
| Pseudogomphonema kantschaticum [%]               | 0.00       | 0.00       | 0.00       | 0.00       | 0.23       | 0.00       | 0.00       | 0.00       | 0.00       | 0.00       | 0.00       |
| Actinocyclus actinochilus [%]                    | 0.40       | 0.72       | 0.43       | 0.14       | 0.23       | 1.52       | 0.23       | 0.32       | 0.00       | 0.17       | 0.14       |
| Berkeleya spp. [%]                               | 0.00       | 0.00       | 0.00       | 0.00       | 0.00       | 0.00       | 0.00       | 0.00       | 0.00       | 0.00       | 0.00       |
| Corethron pennatum [%]                           | 0.20       | 0.00       | 0.00       | 0.00       | 0.46       | 0.22       | 0.00       | 0.16       | 0.48       | 0.00       | 0.14       |
| Eucampia antarctica var. recta [%]               | 0.99       | 1.62       | 0.43       | 1.26       | 0.00       | 0.65       | 0.70       | 0.81       | 0.48       | 1.22       | 1.82       |
| Fragilariopsis curta [%]                         | 1.58       | 3.42       | 1.74       | 0.14       | 0.92       | 1.30       | 2.10       | 1.13       | 0.24       | 2.62       | 1.54       |
| Fragilariopsis cylindrus [%]                     | 0.00       | 0.36       | 1.09       | 0.00       | 0.23       | 0.00       | 0.70       | 0.81       | 0.71       | 0.35       | 0.28       |
| Fragilariopsis nana [%]                          | 0.00       | 0.00       | 0.00       | 0.00       | 0.00       | 0.00       | 0.00       | 0.00       | 0.00       | 0.00       | 0.00       |
| Fragilariopsis obliquecostata [%]                | 0.00       | 0.18       | 0.00       | 0.00       | 0.23       | 0.22       | 0.70       | 0.32       | 0.00       | 0.17       | 0.28       |
| Fragilariopsis peragallii [%]                    | 0.00       | 0.00       | 0.00       | 0.00       | 0.00       | 0.00       | 0.00       | 0.00       | 0.00       | 0.00       | 0.00       |
| Fragilariopsis rhombica [%]                      | 0.00       | 0.72       | 0.22       | 0.00       | 0.69       | 0.87       | 0.00       | 0.00       | 0.24       | 0.35       | 0.14       |
| Fragilariopsis ritscheri [%]                     | 0.20       | 0.00       | 0.43       | 0.14       | 0.00       | 0.22       | 0.00       | 0.16       | 0.24       | 0.17       | 0.00       |
| Fragilariopsis sublinearis [%]                   | 0.00       | 0.00       | 0.22       | 0.00       | 0.00       | 0.22       | 0.23       | 0.32       | 0.00       | 0.00       | 0.14       |
| Fragilariopsis sublin/obliq [%]                  | 0.00       | 0.00       | 0.00       | 0.00       | 0.00       | 0.00       | 0.00       | 0.00       | 0.00       | 0.00       | 0.00       |
| Fragilariopsis vanheurckii [%]                   | 0.20       | 0.90       | 0.00       | 0.14       | 0.23       | 0.22       | 0.47       | 0.48       | 0.48       | 0.17       | 0.28       |
| Neodenticula seminae [%]                         | 0.00       | 0.00       | 0.00       | 0.14       | 0.00       | 0.00       | 0.23       | 0.00       | 0.00       | 0.00       | 0.14       |
| Nitzschia stellata [%]                           | 0.00       | 0.00       | 0.00       | 0.28       | 0.00       | 0.00       | 0.00       | 0.00       | 0.00       | 0.00       | 0.00       |
| N. taeniiiformis [%]                             | 0.00       | 0.00       | 0.00       | 0.14       | 0.00       | 0.00       | 0.00       | 0.32       | 0.00       | 0.00       | 0.00       |
| Odontella weissflogii [%]                        | 0.79       | 1.44       | 1.52       | 0.14       | 0.00       | 0.43       | 0.47       | 0.81       | 1.19       | 1.57       | 0.14       |
| Porosira glacialis [%]                           | 0.00       | 0.36       | 0.43       | 0.28       | 0.00       | 0.00       | 0.47       | 0.00       | 0.00       | 0.00       | 0.14       |
| Porosira pseudodenticulata [%]                   | 0.00       | 0.00       | 0.65       | 0.00       | 0.00       | 0.00       | 0.00       | 0.48       | 0.00       | 0.17       | 0.00       |
| Porosira spp. [%]                                | 0.00       | 0.36       | 0.22       | 0.00       | 0.00       | 0.00       | 0.00       | 0.81       | 0.71       | 0.35       | 0.00       |
| Stellarima microtrias (rs and veg) [%]           | 0.20       | 0.54       | 0.00       | 0.00       | 0.23       | 0.43       | 0.23       | 0.00       | 0.00       | 0.35       | 0.14       |
| Synedropsis laevis [%]                           | 0.00       | 0.00       | 0.00       | 0.00       | 0.00       | 0.00       | 0.00       | 0.00       | 0.00       | 0.00       | 0.00       |
| Synedropsis recta [%]                            | 0.00       | 0.00       | 0.00       | 0.00       | 0.00       | 0.22       | 0.00       | 0.00       | 0.00       | 0.00       | 0.00       |
| Synedra/Synedropsis spp. [%]                     | 0.00       | 0.00       | 0.00       | 0.00       | 0.00       | 0.00       | 0.00       | 0.00       | 0.00       | 0.00       | 0.00       |
| Synedropsis sp. [%]                              | 0.00       | 0.00       | 0.00       | 0.00       | 0.00       | 0.00       | 0.00       | 0.00       | 0.00       | 0.00       | 0.00       |
| Thalassiosira antarctica (T1-cold) [%]           | 0.00       | 0.18       | 0.00       | 0.00       | 0.00       | 0.65       | 0.00       | 0.16       | 0.24       | 0.00       | 0.98       |
| Asteromphalus hookeri [%]                        | 0.00       | 0.00       | 0.00       | 0.00       | 0.00       | 0.00       | 0.00       | 0.00       | 0.00       | 0.00       | 0.00       |
| Asteromphalus hyalinus [%]                       | 0.00       | 0.00       | 0.00       | 0.00       | 0.00       | 0.22       | 0.00       | 0.00       | 0.00       | 0.00       | 0.00       |
| Eucampia antarctica var. antarctica [%]          | 0.59       | 0.72       | 0.22       | 0.42       | 0.00       | 1.09       | 0.47       | 0.00       | 0.24       | 0.00       | 0.56       |
| Fragilariopsis pseudonana [%]                    | 0.00       | 0.00       | 0.00       | 0.00       | 0.00       | 0.00       | 0.00       | 0.00       | 0.00       | 0.00       | 0.00       |
| Fragilariopsis separanda [%]                     | 0.00       | 0.00       | 0.00       | 0.28       | 0.00       | 0.22       | 0.00       | 0.00       | 0.00       | 0.00       | 0.00       |
| Proboscia inermis (winter) [%]                   | 0.20       | 0.00       | 0.00       | 0.28       | 0.00       | 0.87       | 0.00       | 0.16       | 0.00       | 0.35       | 0.00       |
| Proboscia inermis (spring) [%]                   | 0.20       | 0.00       | 0.43       | 0.00       | 0.00       | 0.22       | 0.00       | 0.00       | 0.24       | 0.00       | 0.00       |
| Proboscia alata [%]                              | 0.00       | 0.00       | 0.22       | 0.00       | 0.00       | 0.00       | 0.00       | 0.16       | 0.00       | 0.00       | 0.00       |
| Proboscia spp. [%]                               | 0.20       | 0.00       | 0.00       | 0.00       | 0.00       | 0.00       | 0.00       | 0.00       | 0.00       | 0.00       | 0.42       |
| Pseudo-nitzschia turgiduloides [%]               | 0.00       | 0.00       | 0.00       | 0.00       | 0.00       | 0.00       | 0.00       | 0.16       | 0.24       | 0.09       | 0.14       |
| Rhizosolenia antennata f. antennata [%]          | 0.00       | 0.00       | 0.00       | 0.00       | 0.00       | 0.00       | 0.00       | 0.00       | 0.00       | 0.00       | 0.00       |
| R. antennata f. semispina [%]                    | 0.20       | 1.26       | 0.43       | 0.56       | 0.00       | 0.22       | 0.23       | 0.00       | 0.48       | 0.52       | 0.14       |
| R. polydactyla f. polydactyla [%]                | 0.00       | 0.00       | 0.00       | 0.00       | 0.00       | 0.00       | 0.00       | 0.00       | 0.00       | 0.00       | 0.00       |
| R. simplex [%]                                   | 0.00       | 0.00       | 0.22       | 0.28       | 0.46       | 0.43       | 0.00       | 0.00       | 0.00       | 0.17       | 0.00       |
| Shionodiscus gracilis var. expectus [%]          | 0.59       | 0.00       | 0.00       | 0.00       | 0.00       | 0.00       | 0.47       | 0.16       | 0.24       | 1.22       | 0.42       |
| Shionodiscus gracilis var. gracilis [%]          | 0.99       | 0.36       | 0.22       | 0.42       | 0.46       | 0.22       | 0.00       | 0.16       | 1.43       | 0.35       | 1.82       |
| Shionodiscus frenguelliopsis [%]                 | 0.20       | 0.00       | 0.22       | 0.00       | 0.00       | 0.00       | 0.00       | 0.32       | 1.19       | 0.35       | 0.00       |
| Thalassiosira antarctica (veg+RS) [%]            | 5.53       | 9.55       | 1.74       | 3.51       | 1.15       | 3.04       | 2.80       | 21.61      | 5.94       | 8.54       | 9.26       |
| Thalassiosira gravida [%]                        | 0.00       | 0.00       | 0.43       | 0.00       | 0.00       | 0.00       | 0.00       | 0.00       | 0.00       | 0.17       | 0.00       |
| Thalassiosira lentiginosa [%]                    | 0.59       | 0.36       | 0.00       | 0.56       | 0.23       | 0.43       | 0.23       | 0.00       | 0.00       | 0.00       | 0.00       |
| Thalassiosira maculata [%]                       | 0.00       | 0.00       | 0.00       | 0.00       | 0.00       | 0.00       | 0.23       | 0.16       | 0.00       | 0.00       | 0.00       |
| Thalassiosira oliverana [%]                      | 0.00       | 0.00       | 0.00       | 0.00       | 0.00       | 0.00       | 0.00       | 0.00       | 0.00       | 0.00       | 0.00       |
| Thalassiosira ritscheri [%]                      | 0.00       | 0.00       | 0.00       | 0.00       | 0.69       | 0.22       | 0.70       | 0.65       | 0.24       | 0.00       | 0.42       |
| Thalassiosira scotia [%]                         | 0.00       | 1.80       | 0.65       | 0.00       | 0.46       | 0.43       | 2.33       | 1.61       | 0.71       | 2.79       | 4.21       |
| Thalassiosira antarctica/scotia [%]              | 0.00       | 0.00       | 0.22       | 0.14       | 0.00       | 0.00       | 0.00       | 4.35       | 0.95       | 0.00       | 0.00       |
| Thalassiosira tumida [%]                         | 0.00       | 0.00       | 0.00       | 0.00       | 0.00       | 0.22       | 0.23       | 0.00       | 0.24       | 0.17       | 0.14       |
| Thalassiothrix antarctica [%]                    | 0.00       | 0.00       | 0.00       | 0.00       | 0.00       | 0.00       | 0.00       | 0.00       | 0.00       | 0.00       | 0.00       |
| Trichotoxon reinboldii [%]                       | 0.00       | 0.00       | 0.00       | 0.00       | 0.00       | 0.00       | 0.00       | 0.00       | 0.24       | 0.00       | 0.28       |
| Azpeitia tabularis [%]                           | 0.00       | 0.00       | 0.00       | 0.00       | 0.23       | 0.00       | 0.00       | 0.00       | 0.00       | 0.00       | 0.00       |
| Coscinodiscus aculus-irridis [%]                 | 0.00       | 0.00       | 0.00       | 0.00       | 0.00       | 0.00       | 0.00       | 0.00       | 0.00       | 0.00       | 0.00       |
| Fragilariopsis kerguelensis [%]                  | 2.77       | 1.98       | 0.87       | 1.54       | 0.92       | 2.83       | 0.70       | 0.16       | 0.48       | 0.52       | 0.70       |
| Nitzschia bicipitata [%]                         | 0.00       | 0.00       | 0.00       | 0.00       | 0.00       | 0.00       | 0.00       | 0.16       | 0.00       | 0.00       | 0.00       |
| Shionodiscus oestrupii [%]                       | 0.00       | 0.00       | 0.00       | 0.00       | 0.00       | 0.00       | 0.00       | 0.00       | 0.00       | 0.00       | 0.00       |
| Stephanopyxis turris [%]                         | 0.00       | 0.00       | 0.00       | 0.14       | 0.00       | 0.00       | 0.00       | 0.00       | 0.00       | 0.00       | 0.00       |
| Actinocyclus ingens [%]                          | 0.00       | 0.00       | 0.00       | 0.00       | 0.00       | 0.00       | 0.00       | 0.00       | 0.00       | 0.00       | 0.00       |
| Cladogramma sp. [%]                              | 0.00       | 0.00       | 0.00       | 0.00       | 0.00       | 0.00       | 0.00       | 0.00       | 0.00       | 0.00       | 0.00       |
| Rouxia constricta [%]                            | 0.00       | 0.00       | 0.00       | 0.00       | 0.00       | 0.00       | 0.00       | 0.00       | 0.00       | 0.00       | 0.00       |
| Rouxia leventerae [%]                            | 0.00       | 0.00       | 0.00       | 0.00       | 0.00       | 0.00       | 0.00       | 0.00       | 0.00       | 0.00       | 0.00       |
| Unidentified taxa [%]                            | 0.99       | 2.34       | 0.00       | 0.70       | 0.92       | 0.65       | 1.17       | 1.94       | 1.43       | 2.62       | 0.70       |
| Chaetoceros resting spores [%]                   | 82.21      | 70.27      | 86.74      | 87.94      | 90.78      | 80.43      | 83.92      | 60.97      | 80.29      | 74.28      | 74.33      |
| Total [%]                                        | 100.00     | 100.00     | 100.00     | 100.00     | 100.00     | 100.00     | 100.00     | 100.00     | 100.00     | 100.00     | 100.00     |
| diatom counted                                   | 506        | 555        | 460        | 713        | 435        | 435        | 429        | 620        | 421        | 574        | 713        |
| Diatom concentration [valves/g]                  | 1.18E+08   | 6.07E+07   | 2.57E+08   | 6.68E+07   | 9.69E+07   | 4.49E+07   | 8.20E+07   | 6.32E+07   | 1.28E+08   | 1.06E+08   | 7.12E+07   |
| seasonal sea-ice assemblage [% without CRS]      | 31.40      | 37.35      | 44.64      | 23.96      | 34.18      | 27.32      | 35.00      | 21.59      | 30.29      | 26.58      | 27.27      |
| open ocean cold assemblage [% without CRS]       | 47.44      | 44.98      | 47.62      | 47.03      | 40.27      | 51.22      | 51.35      | 71.59      | 60.42      | 66.21      | 67.60      |
| open ocn warm assemblage [% without CRS]         | 12.25      | 7.03       | 2.78       | 19.56      | 17.94      | 13.41      | 4.62       | 1.14       | 2.88       | 1.74       | 1.61       |
| fossil species [% without CRS]                   | 0.00       | 0.20       | 0.00       | 0.00       | 0.00       | 0.00       | 0.00       | 0.00       | 0.00       | 0.00       | 0.00       |
| benthic and epiphytic assemblage [% without CRS] | 1.11       | 1.81       | 0.60       | 1.10       | 2.88       | 2.44       | 3.27       | 0.68       | 0.80       | 1.24       | 0.73       |
| Diatom concentration [valve/g without CRS]       | 1.65E+07   | 1.97E+07   | 3.83E+07   | 8.53E+06   | 8.68E+06   | 7.95E+06   | 1.05E+07   | 2.24E+07   | 2.09E+07   | 2.68E+07   | 1.71E+07   |

| Event                                            | PS97/072-1 | PS97/072-1 | PS97/072-1 | PS97/072-1 | PS97/072-1 | PS97/072-1 | PS97/072-1 | PS97/072-1 | PS97/072-1 | PS97/072-1 | PS97/072-1 |
|--------------------------------------------------|------------|------------|------------|------------|------------|------------|------------|------------|------------|------------|------------|
| Depth [m]                                        | 7.22       | 7.30       | 7.38       | 7.46       | 7.54       | 7.62       | 7.70       | 7.78       | 7.84       | 7.90       | 7.98       |
| Achnanthes brevipes [%]                          | 0.00       | 0.00       | 0.00       | 0.00       | 0.00       | 0.00       | 0.00       | 0.00       | 0.00       | 0.00       | 0.00       |
| Amphora copulata [%]                             | 0.00       | 0.00       | 0.00       | 0.00       | 0.00       | 0.00       | 0.00       | 0.00       | 0.00       | 0.00       | 0.00       |
| Amphora coffaeaeformis [%]                       | 0.00       | 0.00       | 0.00       | 0.00       | 0.00       | 0.00       | 0.00       | 0.00       | 0.00       | 0.00       | 0.00       |
| Cocconeis costata [%]                            | 0.00       | 0.00       | 0.00       | 0.00       | 0.00       | 0.21       | 0.00       | 0.00       | 0.00       | 0.00       | 0.00       |
| Cocconeis dalmannii [%]                          | 0.00       | 0.00       | 0.00       | 0.00       | 0.00       | 0.00       | 0.00       | 0.00       | 0.00       | 0.00       | 0.00       |
| Cocconeis fasciolata [%]                         | 0.00       | 0.00       | 0.00       | 0.00       | 0.00       | 0.00       | 0.00       | 0.00       | 0.00       | 0.00       | 0.00       |
| Cocconeis californica var. californica [%]       | 0.16       | 0.00       | 0.00       | 0.00       | 0.00       | 0.00       | 0.00       | 0.00       | 0.00       | 0.00       | 0.00       |
| Cocconeis californica var. kerguelensis [%]      | 0.00       | 0.00       | 0.00       | 0.00       | 0.00       | 0.00       | 0.00       | 0.00       | 0.00       | 0.00       | 0.00       |
| Cocconeis melchioroides [%]                      | 0.00       | 0.00       | 0.00       | 0.00       | 0.00       | 0.00       | 0.00       | 0.00       | 0.00       | 0.00       | 0.00       |
| Cocconeis imperatrix [%]                         | 0.00       | 0.00       | 0.00       | 0.00       | 0.00       | 0.00       | 0.00       | 0.00       | 0.00       | 0.00       | 0.00       |
| Cocconeis sp. 1 [%]                              | 0.00       | 0.00       | 0.00       | 0.00       | 0.00       | 0.00       | 0.00       | 0.00       | 0.00       | 0.00       | 0.00       |
| Cocconeis sp. 2 [%]                              | 0.00       | 0.00       | 0.00       | 0.00       | 0.00       | 0.00       | 0.00       | 0.00       | 0.00       | 0.00       | 0.00       |
| Entopilla ocellata [%]                           | 0.00       | 0.00       | 0.00       | 0.00       | 0.00       | 0.00       | 0.00       | 0.00       | 0.00       | 0.00       | 0.00       |
| Fallacia marnieri [%]                            | 0.00       | 0.00       | 0.00       | 0.00       | 0.00       | 0.00       | 0.00       | 0.00       | 0.00       | 0.00       | 0.00       |
| Gomphomenopsis littoralis [%]                    | 0.00       | 0.00       | 0.17       | 0.00       | 0.00       | 0.00       | 0.00       | 0.00       | 0.00       | 0.00       | 0.00       |
| Grammatophora angulosa [%]                       | 0.00       | 0.00       | 0.00       | 0.00       | 0.00       | 0.00       | 0.00       | 0.00       | 0.00       | 0.00       | 0.00       |
| Licmophora gracilis [%]                          | 0.00       | 0.00       | 0.00       | 0.00       | 0.00       | 0.00       | 0.00       | 0.00       | 0.00       | 0.00       | 0.00       |
| Melosira adeliae [%]                             | 0.00       | 0.00       | 0.00       | 0.00       | 0.00       | 0.00       | 0.00       | 0.00       | 0.00       | 0.00       | 0.00       |
| Navicula directa [%]                             | 0.00       | 0.00       | 0.35       | 0.25       | 0.00       | 0.00       | 0.00       | 0.00       | 0.00       | 0.00       | 0.00       |
| Navicula glaciei [%]                             | 0.00       | 0.00       | 0.00       | 0.00       | 0.00       | 0.00       | 0.00       | 0.00       | 0.00       | 0.21       | 0.00       |
| Navicula imperfecta [%]                          | 0.00       | 0.00       | 0.00       | 0.00       | 0.00       | 0.00       | 0.00       | 0.00       | 0.00       | 0.00       | 0.00       |
| Navicula perminuta [%]                           | 0.00       | 0.00       | 0.17       | 0.00       | 0.00       | 0.00       | 0.00       | 0.00       | 0.00       | 0.00       | 0.00       |
| Paralia sulcata [%]                              | 0.00       | 0.00       | 0.00       | 0.00       | 0.00       | 0.00       | 0.00       | 0.00       | 0.00       | 0.00       | 0.00       |
| Planothidium vicentii [%]                        | 0.00       | 0.00       | 0.00       | 0.00       | 0.00       | 0.00       | 0.00       | 0.00       | 0.00       | 0.00       | 0.00       |
| Pseudogomphonema kantschaticum [%]               | 0.00       | 0.00       | 0.00       | 0.00       | 0.00       | 0.00       | 0.00       | 0.00       | 0.00       | 0.00       | 0.00       |
| Actinocyclus actinochilus [%]                    | 0.33       | 1.58       | 0.70       | 0.49       | 0.65       | 0.43       | 0.17       | 0.55       | 0.39       | 0.85       | 0.00       |
| Berkeleya spp. [%]                               | 0.00       | 0.00       | 0.00       | 0.00       | 0.00       | 0.00       | 0.00       | 0.00       | 0.00       | 0.00       | 0.00       |
| Corethron pennatum [%]                           | 0.99       | 0.23       | 0.17       | 0.99       | 0.22       | 0.21       | 0.17       | 0.37       | 0.58       | 0.85       | 0.40       |
| Eucampia antarctica var. recta [%]               | 0.66       | 1.58       | 0.70       | 0.00       | 0.86       | 0.64       | 0.17       | 0.00       | 0.00       | 0.21       | 0.20       |
| Fragilariopsis curta [%]                         | 2.64       | 1.13       | 2.80       | 1.72       | 0.65       | 1.28       | 1.32       | 1.83       | 1.35       | 4.48       | 2.20       |
| Fragilariopsis cylindrus [%]                     | 0.66       | 0.68       | 1.22       | 0.99       | 0.43       | 1.07       | 0.33       | 2.20       | 0.39       | 0.21       | 0.20       |
| Fragilariopsis nana [%]                          | 0.00       | 0.00       | 0.00       | 0.00       | 0.00       | 0.00       | 0.00       | 0.00       | 0.00       | 0.00       | 0.00       |
| Fragilariopsis obliquecostata [%]                | 0.16       | 0.23       | 0.35       | 0.25       | 0.22       | 0.43       | 0.00       | 0.00       | 0.39       | 0.00       | 0.20       |
| Fragilariopsis peragallii [%]                    | 0.00       | 0.00       | 0.00       | 0.00       | 0.00       | 0.00       | 0.17       | 0.00       | 0.00       | 0.00       | 0.00       |
| Fragilariopsis rhombica [%]                      | 0.16       | 0.00       | 0.00       | 0.00       | 0.00       | 0.21       | 0.17       | 0.55       | 0.00       | 0.21       | 0.20       |
| Fragilariopsis ritscheri [%]                     | 0.16       | 0.00       | 0.00       | 0.25       | 0.00       | 0.64       | 0.00       | 0.00       | 0.19       | 0.21       | 0.00       |
| Fragilariopsis sublinearis [%]                   | 0.16       | 0.45       | 0.00       | 0.00       | 0.00       | 0.00       | 0.17       | 0.37       | 0.00       | 0.00       | 0.00       |
| Fragilariopsis sublin/obliq [%]                  | 0.00       | 0.00       | 0.00       | 0.00       | 0.00       | 0.00       | 0.00       | 0.00       | 0.00       | 0.00       | 0.00       |
| Fragilariopsis vanheurckii [%]                   | 1.15       | 0.45       | 0.35       | 0.49       | 0.22       | 0.43       | 0.00       | 0.37       | 0.39       | 0.64       | 1.00       |
| Neodenticula seminae [%]                         | 0.00       | 0.00       | 0.00       | 0.00       | 0.00       | 0.00       | 0.00       | 0.18       | 0.00       | 0.00       | 0.00       |
| Nitzschia stellata [%]                           | 0.00       | 0.00       | 0.00       | 0.00       | 0.00       | 0.21       | 0.00       | 0.18       | 0.00       | 0.00       | 0.00       |
| N. taeniiiformis [%]                             | 0.00       | 0.00       | 0.00       | 0.00       | 0.00       | 0.00       | 0.00       | 0.18       | 0.00       | 0.00       | 0.00       |
| Odontella weissflogii [%]                        | 1.32       | 0.90       | 0.00       | 0.00       | 0.00       | 0.43       | 0.00       | 0.18       | 0.19       | 0.43       | 0.00       |
| Porosira glacialis [%]                           | 0.33       | 0.00       | 0.00       | 0.00       | 0.00       | 0.00       | 0.00       | 0.00       | 0.19       | 0.00       | 0.00       |
| Porosira pseudodenticulata [%]                   | 0.33       | 0.45       | 0.35       | 0.00       | 0.22       | 0.21       | 0.33       | 0.00       | 0.00       | 0.21       | 0.00       |
| Porosira spp. [%]                                | 0.33       | 0.00       | 1.40       | 1.23       | 0.22       | 0.64       | 0.33       | 0.18       | 0.58       | 0.21       | 0.40       |
| Stellarima microtrias (rs and veg) [%]           | 0.16       | 0.00       | 0.52       | 0.00       | 0.22       | 0.21       | 0.00       | 0.00       | 0.00       | 0.00       | 0.20       |
| Synedropsis laevis [%]                           | 0.00       | 0.00       | 0.00       | 0.00       | 0.00       | 0.00       | 0.00       | 0.00       | 0.00       | 0.00       | 0.00       |
| Synedropsis recta [%]                            | 0.00       | 0.00       | 0.00       | 0.00       | 0.00       | 0.00       | 0.00       | 0.00       | 0.00       | 0.00       | 0.00       |
| Synedra/Synedropsis spp. [%]                     | 0.00       | 0.00       | 0.00       | 0.00       | 0.00       | 0.00       | 0.00       | 0.00       | 0.00       | 0.00       | 0.00       |
| Synedropsis sp. [%]                              | 0.00       | 0.00       | 0.00       | 0.00       | 0.00       | 0.00       | 0.00       | 0.00       | 0.00       | 0.00       | 0.00       |
| Thalassiosira antarctica (T1-cold) [%]           | 0.00       | 0.00       | 0.17       | 0.25       | 0.43       | 0.43       | 0.00       | 0.18       | 0.19       | 1.07       | 0.20       |
| Asteromphalus hookeri [%]                        | 0.00       | 0.00       | 0.00       | 0.00       | 0.00       | 0.00       | 0.00       | 0.00       | 0.00       | 0.00       | 0.00       |
| Asteromphalus hyalinus [%]                       | 0.00       | 0.00       | 0.00       | 0.00       | 0.00       | 0.00       | 0.00       | 0.00       | 0.00       | 0.00       | 0.00       |
| Eucampia antarctica var. antarctica [%]          | 0.16       | 0.23       | 0.00       | 0.25       | 0.00       | 0.00       | 0.00       | 0.00       | 0.00       | 0.00       | 0.00       |
| Fragilariopsis pseudonana [%]                    | 0.00       | 0.00       | 0.00       | 0.00       | 0.00       | 0.00       | 0.00       | 0.00       | 0.00       | 0.00       | 0.00       |
| Fragilariopsis separanda [%]                     | 0.00       | 0.00       | 0.00       | 0.00       | 0.00       | 0.00       | 0.00       | 0.00       | 0.00       | 0.21       | 0.00       |
| Proboscia inermis (winter) [%]                   | 0.00       | 0.00       | 0.35       | 0.99       | 0.22       | 0.64       | 0.00       | 0.55       | 0.19       | 0.00       | 0.00       |
| Proboscia inermis (spring) [%]                   | 0.33       | 0.00       | 0.35       | 0.00       | 0.22       | 0.43       | 0.00       | 0.18       | 0.00       | 0.00       | 0.00       |
| Proboscia alata [%]                              | 0.00       | 0.00       | 0.00       | 0.00       | 0.00       | 0.00       | 0.00       | 0.73       | 0.00       | 0.21       | 0.00       |
| Proboscia spp. [%]                               | 0.00       | 0.23       | 0.00       | 0.00       | 0.00       | 0.00       | 0.66       | 0.00       | 0.00       | 0.00       | 0.00       |
| Pseudo-nitzschia turgiduloides [%]               | 0.25       | 0.00       | 0.35       | 0.49       | 0.00       | 0.43       | 0.00       | 0.18       | 0.00       | 0.21       | 0.00       |
| Rhizosolenia antennata f. antennata [%]          | 0.00       | 0.00       | 0.00       | 0.00       | 0.00       | 0.00       | 0.00       | 0.00       | 0.00       | 0.00       | 0.00       |
| R. antennata f. semispina [%]                    | 0.16       | 0.00       | 0.17       | 0.25       | 0.00       | 0.00       | 0.00       | 0.00       | 0.00       | 0.21       | 0.20       |
| R. polydactyla f. polydactyla [%]                | 0.00       | 0.00       | 0.00       | 0.00       | 0.00       | 0.00       | 0.00       | 0.00       | 0.00       | 0.00       | 0.00       |
| R. simplex [%]                                   | 0.00       | 0.00       | 0.00       | 0.00       | 0.00       | 0.00       | 0.00       | 0.00       | 0.00       | 0.00       | 0.20       |
| Shionodiscus gracilis var. expectatus [%]        | 0.82       | 0.45       | 0.17       | 0.25       | 0.22       | 0.21       | 0.66       | 0.92       | 0.00       | 0.00       | 0.00       |
| Shionodiscus gracilis var. gracilis [%]          | 0.49       | 0.00       | 0.17       | 0.00       | 0.22       | 0.21       | 0.17       | 0.73       | 1.16       | 0.21       | 0.20       |
| Shionodiscus frenguelliopsis [%]                 | 0.33       | 0.00       | 0.52       | 0.00       | 0.00       | 0.21       | 0.33       | 0.00       | 0.00       | 0.00       | 0.00       |
| Thalassiosira antarctica (veg+RS) [%]            | 11.54      | 6.53       | 6.99       | 2.96       | 2.81       | 4.90       | 7.43       | 2.57       | 3.87       | 1.92       | 3.00       |
| Thalassiosira gravida [%]                        | 0.16       | 0.00       | 0.00       | 0.00       | 0.00       | 0.00       | 0.00       | 0.00       | 0.00       | 0.00       | 0.00       |
| Thalassiosira lentiginosa [%]                    | 0.00       | 0.00       | 0.00       | 0.25       | 0.00       | 0.43       | 0.33       | 0.18       | 0.00       | 0.43       | 0.00       |
| Thalassiosira maculata [%]                       | 0.00       | 0.00       | 0.00       | 0.00       | 0.22       | 0.00       | 0.00       | 0.00       | 0.00       | 0.00       | 0.00       |
| Thalassiosira oliverana [%]                      | 0.16       | 0.00       | 0.00       | 0.00       | 0.00       | 0.00       | 0.00       | 0.00       | 0.00       | 0.00       | 0.00       |
| Thalassiosira ritscheri [%]                      | 0.00       | 0.00       | 0.35       | 0.00       | 0.43       | 0.21       | 0.00       | 0.18       | 0.39       | 0.21       | 0.00       |
| Thalassiosira scotia [%]                         | 2.31       | 0.68       | 1.57       | 0.49       | 0.00       | 0.64       | 0.66       | 0.18       | 0.58       | 0.21       | 0.00       |
| Thalassiosira antarctica/scotia [%]              | 0.49       | 0.23       | 0.70       | 0.49       | 0.86       | 0.85       | 1.32       | 0.55       | 0.39       | 0.64       | 0.20       |
| Thalassiosira tumida [%]                         | 0.16       | 0.00       | 0.35       | 0.00       | 0.00       | 0.00       | 0.17       | 0.00       | 0.00       | 0.00       | 0.00       |
| Thalassiothrix antarctica [%]                    | 0.00       | 0.00       | 0.00       | 0.00       | 0.00       | 0.00       | 0.00       | 0.00       | 0.00       | 0.00       | 0.00       |
| Trichotoxon reinboldii [%]                       | 0.00       | 0.00       | 0.00       | 0.00       | 0.00       | 0.00       | 0.00       | 0.00       | 0.00       | 0.00       | 0.00       |
| Azpeitia tabularis [%]                           | 0.00       | 0.00       | 0.00       | 0.00       | 0.00       | 0.00       | 0.00       | 0.00       | 0.00       | 0.00       | 0.00       |
| Coscinodiscus acculus-irridis [%]                | 0.16       | 0.00       | 0.00       | 0.00       | 0.22       | 0.00       | 0.00       | 0.00       | 0.00       | 0.00       | 0.00       |
| Fragilariopsis kerguelensis [%]                  | 0.33       | 0.00       | 0.17       | 0.00       | 0.22       | 0.43       | 0.17       | 0.37       | 0.39       | 0.00       | 0.00       |
| Nitzschia bicipitata [%]                         | 0.00       | 0.00       | 0.00       | 0.00       | 0.00       | 0.00       | 0.00       | 0.00       | 0.00       | 0.00       | 0.00       |
| Shionodiscus oestrupii [%]                       | 0.00       | 0.00       | 0.00       | 0.00       | 0.00       | 0.64       | 0.00       | 0.00       | 0.00       | 0.00       | 0.00       |
| Stephanopyxis turris [%]                         | 0.16       | 0.00       | 0.00       | 0.00       | 0.00       | 0.00       | 0.00       | 0.00       | 0.00       | 0.00       | 0.00       |
| Actinocyclus ingens [%]                          | 0.00       | 0.00       | 0.00       | 0.00       | 0.00       | 0.00       | 0.00       | 0.00       | 0.00       | 0.00       | 0.00       |
| Cladogramma sp. [%]                              | 0.00       | 0.00       | 0.00       | 0.00       | 0.00       | 0.00       | 0.00       | 0.00       | 0.00       | 0.00       | 0.00       |
| Rouxia constricta [%]                            | 0.00       | 0.00       | 0.00       | 0.00       | 0.00       | 0.00       | 0.00       | 0.00       | 0.00       | 0.00       | 0.00       |
| Rouxia leventerae [%]                            | 0.00       | 0.00       | 0.00       | 0.00       | 0.00       | 0.00       | 0.00       | 0.00       | 0.00       | 0.00       | 0.00       |
| Unidentified taxa [%]                            | 1.32       | 1.35       | 0.70       | 0.99       | 0.00       | 0.43       | 0.66       | 0.92       | 0.19       | 0.43       | 0.80       |
| Chaetoceros resting spores [%]                   | 70.90      | 82.66      | 77.62      | 85.71      | 90.06      | 81.66      | 84.16      | 84.40      | 88.01      | 85.29      | 90.20      |
| Total [%]                                        | 100.00     | 100.00     | 100.00     | 100.00     | 100.00     | 100.00     | 100.00     | 100.00     | 100.00     | 100.00     | 100.00     |
| diatom counted                                   | 607        | 444        | 572        | 406        | 463        | 469        | 606        | 545        | 517        | 469        | 500        |
| Diatom concentration [valves/g]                  | 6.07E+07   | 9.71E+07   | 1.07E+08   | 9.27E+07   | 1.58E+08   | 1.20E+08   | 6.28E+07   | 1.09E+08   | 6.82E+07   | 9.23E+07   | 1.00E+08   |
| seasonal sea-ice assemblage [% without CRS]      | 29.34      | 36.25      | 37.11      | 38.77      | 44.25      | 37.67      | 27.47      | 50.98      | 50.48      | 55.69      | 60.75      |
| open ocean cold assemblage [% without CRS]       | 63.74      | 60.10      | 57.14      | 56.84      | 48.73      | 56.02      | 68.19      | 44.66      | 44.71      | 39.34      | 35.03      |
| open ocn warm assemblage [% without CRS]         | 1.95       | 0.73       | 0.37       | 0.70       | 1.20       | 2.29       | 2.17       | 1.53       | 1.44       | 1.42       | 0.44       |
| fossil species [% without CRS]                   | 0.00       | 0.00       | 0.00       | 0.00       | 0.00       | 0.00       | 0.00       | 0.00       | 0.24       | 0.00       | 0.00       |
| benthic and epiphytic assemblage [% without CRS] | 1.42       | 0.73       | 1.67       | 1.23       | 1.49       | 0.96       | 0.24       | 2.18       | 1.44       | 0.71       | 0.22       |
| Diatom concentration [valve/g without CRS]       | 2.82E+07   | 1.28E+07   | 2.16E+07   | 2.38E+07   | 1.96E+07   | 2.11E+07   | 1.08E+07   | 1.83E+07   | 7.40E+06   | 1.18E+07   | 9.75E+06   |

</



| Event                                            | PS97/072-1 | PS97/072-1 | PS97/072-1 | PS97/072-1 | PS97/072-1 | PS97/072-1 | PS97/072-1 | PS97/072-1 | PS97/072-1 | PS97/072-1 | PS97/072-1 |
|--------------------------------------------------|------------|------------|------------|------------|------------|------------|------------|------------|------------|------------|------------|
| Depth [m]                                        | 8.06       | 8.10       | 8.14       | 8.22       | 8.30       | 8.38       | 8.46       | 8.54       | 8.62       | 8.70       | 8.78       |
| Achnanthes brevipes [%]                          | 0.00       | 0.00       | 0.00       | 0.00       | 0.00       | 0.00       | 0.00       | 0.00       | 0.00       | 0.00       | 0.00       |
| Amphora copulata [%]                             | 0.00       | 0.00       | 0.00       | 0.00       | 0.00       | 0.00       | 0.00       | 0.00       | 0.00       | 0.00       | 0.00       |
| Amphora coffeaeformis [%]                        | 0.00       | 0.00       | 0.00       | 0.00       | 0.00       | 0.00       | 0.00       | 0.00       | 0.00       | 0.00       | 0.00       |
| Cocconeis costata [%]                            | 0.00       | 0.00       | 0.00       | 0.00       | 0.00       | 0.00       | 0.00       | 0.00       | 0.00       | 0.00       | 0.00       |
| Cocconeis dalmannii [%]                          | 0.00       | 0.00       | 0.00       | 0.00       | 0.16       | 0.00       | 0.00       | 0.00       | 0.00       | 0.23       | 0.00       |
| Cocconeis fasciolata [%]                         | 0.00       | 0.00       | 0.00       | 0.00       | 0.00       | 0.00       | 0.00       | 0.21       | 0.00       | 0.00       | 0.00       |
| Cocconeis californica var. californica [%]       | 0.00       | 0.00       | 0.00       | 0.00       | 0.16       | 0.20       | 0.00       | 0.00       | 0.00       | 0.00       | 0.00       |
| Cocconeis californica var. kerguelensis [%]      | 0.00       | 0.00       | 0.00       | 0.00       | 0.00       | 0.00       | 0.00       | 0.00       | 0.00       | 0.00       | 0.00       |
| Cocconeis melchioroides [%]                      | 0.00       | 0.00       | 0.00       | 0.00       | 0.00       | 0.00       | 0.00       | 0.21       | 0.00       | 0.00       | 0.00       |
| Cocconeis imperatrix [%]                         | 0.00       | 0.00       | 0.16       | 0.00       | 0.00       | 0.00       | 0.00       | 0.00       | 0.00       | 0.00       | 0.00       |
| Cocconeis sp. 1 [%]                              | 0.00       | 0.00       | 0.00       | 0.00       | 0.00       | 0.00       | 0.00       | 0.00       | 0.00       | 0.00       | 0.00       |
| Cocconeis sp. 2 [%]                              | 0.00       | 0.00       | 0.00       | 0.00       | 0.00       | 0.00       | 0.00       | 0.00       | 0.00       | 0.00       | 0.00       |
| Entopilla ocellata [%]                           | 0.00       | 0.00       | 0.00       | 0.00       | 0.00       | 0.00       | 0.00       | 0.00       | 0.00       | 0.00       | 0.00       |
| Fallacia marnieri [%]                            | 0.00       | 0.00       | 0.00       | 0.00       | 0.00       | 0.00       | 0.00       | 0.00       | 0.00       | 0.00       | 0.00       |
| Gomphonemopsis littoralis [%]                    | 0.00       | 0.00       | 0.00       | 0.00       | 0.00       | 0.00       | 0.00       | 0.00       | 0.00       | 0.00       | 0.00       |
| Grammatophora angulosa [%]                       | 0.00       | 0.00       | 0.00       | 0.00       | 0.00       | 0.00       | 0.00       | 0.00       | 0.00       | 0.00       | 0.00       |
| Licmophora gracilis [%]                          | 0.00       | 0.00       | 0.00       | 0.00       | 0.00       | 0.00       | 0.00       | 0.00       | 0.00       | 0.00       | 0.20       |
| Melosira adeliae [%]                             | 0.00       | 0.00       | 0.00       | 0.00       | 0.00       | 0.00       | 0.00       | 0.00       | 0.00       | 0.00       | 0.20       |
| Navicula directa [%]                             | 0.00       | 0.00       | 0.16       | 0.00       | 0.00       | 0.40       | 0.00       | 0.00       | 0.24       | 0.00       | 0.00       |
| Navicula glaciei [%]                             | 0.00       | 0.00       | 0.00       | 0.00       | 0.00       | 0.20       | 0.00       | 0.00       | 0.24       | 0.00       | 0.00       |
| Navicula imperfecta [%]                          | 0.00       | 0.00       | 0.00       | 0.00       | 0.00       | 0.00       | 0.00       | 0.00       | 0.00       | 0.00       | 0.00       |
| Navicula perminuta [%]                           | 0.00       | 0.00       | 0.00       | 0.00       | 0.00       | 0.00       | 0.00       | 0.21       | 0.00       | 0.00       | 0.00       |
| Paralia sulcata [%]                              | 0.00       | 0.00       | 0.00       | 0.00       | 0.00       | 0.00       | 0.00       | 0.00       | 0.00       | 0.00       | 0.00       |
| Planothidium vicentii [%]                        | 0.00       | 0.00       | 0.00       | 0.00       | 0.00       | 0.00       | 0.00       | 0.00       | 0.00       | 0.00       | 0.00       |
| Pseudogomphonema kantschaticum [%]               | 0.00       | 0.00       | 0.00       | 0.22       | 0.00       | 0.00       | 0.00       | 0.00       | 0.00       | 0.00       | 0.00       |
| Actinocyclus actinochilus [%]                    | 0.80       | 0.23       | 1.09       | 0.66       | 1.56       | 0.79       | 0.45       | 0.21       | 1.21       | 1.38       | 1.00       |
| Berkeleya spp. [%]                               | 0.00       | 0.00       | 0.00       | 0.00       | 0.00       | 0.00       | 0.00       | 0.00       | 0.00       | 0.00       | 0.00       |
| Corethron pennatum [%]                           | 0.32       | 0.00       | 0.47       | 0.00       | 0.00       | 0.00       | 0.00       | 0.21       | 0.49       | 0.00       | 0.00       |
| Eucampia antarctica var. recta [%]               | 0.00       | 0.00       | 0.16       | 0.00       | 0.00       | 0.20       | 0.00       | 0.21       | 0.12       | 0.23       | 0.00       |
| Fragilariopsis curta [%]                         | 0.80       | 0.46       | 1.25       | 1.98       | 3.13       | 5.34       | 2.45       | 1.87       | 2.55       | 0.46       | 0.40       |
| Fragilariopsis cylindrus [%]                     | 0.16       | 0.23       | 0.00       | 0.44       | 0.63       | 1.78       | 0.22       | 0.00       | 1.33       | 0.00       | 0.00       |
| Fragilariopsis nana [%]                          | 0.00       | 0.00       | 0.00       | 0.00       | 0.00       | 0.00       | 0.00       | 0.00       | 0.00       | 0.00       | 0.00       |
| Fragilariopsis obliquecostata [%]                | 0.00       | 0.23       | 0.16       | 0.22       | 0.31       | 0.40       | 0.22       | 0.42       | 0.12       | 0.46       | 0.00       |
| Fragilariopsis peragallii [%]                    | 0.00       | 0.00       | 0.00       | 0.00       | 0.00       | 0.00       | 0.00       | 0.00       | 0.00       | 0.00       | 0.00       |
| Fragilariopsis rhombica [%]                      | 0.16       | 0.00       | 0.00       | 0.22       | 0.47       | 0.20       | 0.22       | 0.62       | 0.49       | 0.00       | 0.00       |
| Fragilariopsis ritscheri [%]                     | 0.00       | 0.00       | 0.00       | 0.22       | 0.00       | 0.59       | 0.00       | 0.00       | 0.36       | 0.23       | 0.20       |
| Fragilariopsis sublinearis [%]                   | 0.00       | 0.00       | 0.16       | 0.22       | 0.31       | 0.20       | 0.22       | 0.62       | 0.61       | 0.00       | 0.20       |
| Fragilariopsis sublin/obliq [%]                  | 0.00       | 0.00       | 0.00       | 0.00       | 0.00       | 0.00       | 0.00       | 0.00       | 0.00       | 0.00       | 0.00       |
| Fragilariopsis vanheurckii [%]                   | 0.16       | 0.23       | 0.16       | 1.54       | 0.63       | 2.17       | 0.00       | 0.62       | 0.85       | 0.00       | 0.60       |
| Neodenticula seminae [%]                         | 0.00       | 0.00       | 0.00       | 0.00       | 0.00       | 0.00       | 0.00       | 0.00       | 0.24       | 0.00       | 0.00       |
| Nitzschia stellata [%]                           | 0.00       | 0.00       | 0.00       | 0.00       | 0.00       | 0.59       | 0.00       | 0.00       | 0.00       | 0.00       | 0.00       |
| N. taeniiiformis [%]                             | 0.00       | 0.00       | 0.00       | 0.00       | 0.00       | 0.00       | 0.00       | 0.00       | 0.00       | 0.23       | 0.00       |
| Odontella weissflogii [%]                        | 0.00       | 0.00       | 0.16       | 0.00       | 0.47       | 0.59       | 0.00       | 0.21       | 0.24       | 0.23       | 0.20       |
| Porosira glacialis [%]                           | 0.32       | 0.00       | 0.16       | 0.22       | 0.31       | 0.00       | 0.00       | 0.21       | 0.00       | 0.00       | 0.00       |
| Porosira pseudodenticulata [%]                   | 0.00       | 0.00       | 0.00       | 0.22       | 0.00       | 0.59       | 0.67       | 0.83       | 0.97       | 0.23       | 0.00       |
| Porosira spp. [%]                                | 0.00       | 0.00       | 0.31       | 0.00       | 0.31       | 0.79       | 0.00       | 0.00       | 0.24       | 0.00       | 0.20       |
| Stellarima microtrias (rs and veg) [%]           | 0.48       | 0.23       | 0.62       | 0.22       | 0.31       | 0.79       | 0.00       | 0.00       | 0.24       | 0.69       | 1.20       |
| Synedropsis laevis [%]                           | 0.00       | 0.00       | 0.00       | 0.00       | 0.00       | 0.20       | 0.00       | 0.00       | 0.00       | 0.00       | 0.00       |
| Synedropsis recta [%]                            | 0.16       | 0.00       | 0.00       | 0.00       | 0.00       | 0.00       | 0.00       | 0.00       | 0.00       | 0.00       | 0.00       |
| Synedra/Synedropsis spp. [%]                     | 0.00       | 0.00       | 0.00       | 0.00       | 0.00       | 0.00       | 0.00       | 0.00       | 0.00       | 0.00       | 0.00       |
| Synedropsis sp. [%]                              | 0.00       | 0.00       | 0.00       | 0.00       | 0.00       | 0.00       | 0.00       | 0.00       | 0.00       | 0.00       | 0.00       |
| Thalassiosira antarctica (T1-cold) [%]           | 0.64       | 0.23       | 0.62       | 0.00       | 1.25       | 0.79       | 1.34       | 3.74       | 1.46       | 0.92       | 1.40       |
| Asteromphalus hookeri [%]                        | 0.00       | 0.00       | 0.00       | 0.00       | 0.00       | 0.00       | 0.00       | 0.00       | 0.00       | 0.00       | 0.00       |
| Asteromphalus hyalinus [%]                       | 0.00       | 0.00       | 0.00       | 0.00       | 0.00       | 0.00       | 0.00       | 0.00       | 0.00       | 0.00       | 0.00       |
| Eucampia antarctica var. antarctica [%]          | 0.00       | 0.00       | 0.00       | 0.00       | 0.00       | 0.00       | 0.00       | 0.00       | 0.00       | 0.00       | 0.00       |
| Fragilariopsis pseudonana [%]                    | 0.00       | 0.00       | 0.00       | 0.00       | 0.00       | 0.00       | 0.00       | 0.00       | 0.00       | 0.00       | 0.00       |
| Fragilariopsis separanda [%]                     | 0.00       | 0.00       | 0.00       | 0.00       | 0.00       | 0.00       | 0.00       | 0.21       | 0.00       | 0.00       | 0.20       |
| Proboscia inermis (winter) [%]                   | 0.00       | 0.00       | 0.16       | 0.00       | 0.16       | 0.00       | 0.00       | 0.00       | 0.00       | 0.00       | 0.00       |
| Proboscia inermis (spring) [%]                   | 0.00       | 0.00       | 0.16       | 0.00       | 0.00       | 0.40       | 0.00       | 0.00       | 0.00       | 0.00       | 0.20       |
| Proboscia alata [%]                              | 0.32       | 0.00       | 0.00       | 0.22       | 0.00       | 0.00       | 0.00       | 0.00       | 0.12       | 0.00       | 0.00       |
| Proboscia spp. [%]                               | 0.00       | 0.00       | 0.00       | 0.00       | 0.00       | 0.00       | 0.00       | 0.00       | 0.00       | 0.00       | 0.00       |
| Pseudo-nitzschia turgiduloides [%]               | 0.00       | 0.00       | 0.00       | 0.00       | 0.00       | 0.40       | 0.00       | 0.00       | 0.49       | 0.00       | 0.20       |
| Rhizosolenia antennata f. antennata [%]          | 0.00       | 0.00       | 0.00       | 0.00       | 0.00       | 0.00       | 0.00       | 0.00       | 0.00       | 0.00       | 0.00       |
| R. antennata f. semispina [%]                    | 0.00       | 0.00       | 0.16       | 0.00       | 0.16       | 0.20       | 0.00       | 0.00       | 0.00       | 0.00       | 0.20       |
| R. polydactyla f. polydactyla [%]                | 0.00       | 0.00       | 0.00       | 0.00       | 0.00       | 0.00       | 0.00       | 0.00       | 0.00       | 0.00       | 0.00       |
| R. simplex [%]                                   | 0.00       | 0.23       | 0.00       | 0.66       | 0.31       | 0.40       | 0.00       | 0.62       | 0.00       | 0.00       | 0.00       |
| Shionodiscus gracilis var. expectus [%]          | 0.00       | 0.00       | 0.00       | 0.00       | 0.00       | 0.00       | 0.00       | 0.42       | 0.00       | 0.00       | 0.00       |
| Shionodiscus gracilis var. gracilis [%]          | 0.00       | 0.00       | 0.16       | 0.22       | 0.16       | 0.20       | 0.22       | 0.83       | 0.12       | 0.23       | 0.40       |
| Shionodiscus frenguelliopsis [%]                 | 0.00       | 0.00       | 0.00       | 0.00       | 0.00       | 0.00       | 0.00       | 0.00       | 0.12       | 0.00       | 0.00       |
| Thalassiosira antarctica (veg+RS) [%]            | 3.18       | 3.87       | 5.92       | 5.49       | 13.44      | 9.49       | 15.81      | 15.80      | 8.13       | 46.31      | 13.63      |
| Thalassiosira gravida [%]                        | 0.00       | 0.00       | 0.00       | 0.00       | 0.00       | 0.00       | 0.00       | 0.00       | 0.00       | 0.00       | 0.00       |
| Thalassiosira lentiginosa [%]                    | 0.00       | 0.23       | 0.16       | 0.22       | 0.00       | 0.20       | 0.00       | 0.42       | 0.00       | 0.00       | 0.20       |
| Thalassiosira maculata [%]                       | 0.00       | 0.00       | 0.00       | 0.00       | 0.00       | 0.00       | 0.00       | 0.00       | 0.00       | 0.00       | 0.00       |
| Thalassiosira oliverana [%]                      | 0.00       | 0.00       | 0.00       | 0.00       | 0.00       | 0.00       | 0.00       | 0.00       | 0.00       | 0.00       | 0.00       |
| Thalassiosira ritscheri [%]                      | 0.00       | 0.00       | 0.00       | 0.00       | 0.00       | 0.00       | 0.00       | 0.00       | 0.00       | 0.00       | 0.00       |
| Thalassiosira scotia [%]                         | 0.64       | 0.00       | 0.31       | 0.22       | 0.16       | 1.98       | 0.22       | 1.04       | 1.33       | 0.00       | 0.20       |
| Thalassiosira antarctica/scotia [%]              | 0.80       | 0.68       | 2.18       | 2.64       | 6.56       | 3.36       | 0.00       | 8.73       | 3.16       | 0.92       | 7.41       |
| Thalassiosira tumida [%]                         | 0.00       | 0.00       | 0.00       | 0.00       | 0.31       | 0.00       | 0.22       | 0.83       | 0.24       | 0.00       | 0.00       |
| Thalassiothrix antarctica [%]                    | 0.00       | 0.00       | 0.00       | 0.00       | 0.00       | 0.00       | 0.00       | 0.00       | 0.00       | 0.00       | 0.00       |
| Trichotoxon reinboldii [%]                       | 0.00       | 0.00       | 0.16       | 0.00       | 0.00       | 0.00       | 0.00       | 0.00       | 0.00       | 0.23       | 0.00       |
| Azpeitia tabularis [%]                           | 0.00       | 0.00       | 0.00       | 0.00       | 0.00       | 0.00       | 0.00       | 0.00       | 0.00       | 0.00       | 0.00       |
| Coscinodiscus acculus-irridis [%]                | 0.00       | 0.00       | 0.00       | 0.00       | 0.00       | 0.00       | 0.00       | 0.00       | 0.00       | 0.00       | 0.00       |
| Fragilariopsis kerguelensis [%]                  | 0.00       | 0.23       | 0.00       | 0.44       | 0.47       | 1.58       | 1.11       | 0.83       | 0.49       | 1.15       | 0.60       |
| Nitzschia bicipitata [%]                         | 0.00       | 0.00       | 0.00       | 0.00       | 0.00       | 0.00       | 0.00       | 0.00       | 0.00       | 0.00       | 0.00       |
| Shionodiscus oestrupii [%]                       | 0.00       | 0.00       | 0.00       | 0.00       | 0.16       | 0.00       | 0.00       | 0.00       | 0.00       | 0.00       | 0.00       |
| Stephanopyxis turris [%]                         | 0.00       | 0.00       | 0.00       | 0.00       | 0.00       | 0.00       | 0.00       | 0.00       | 0.00       | 0.00       | 0.00       |
| Actinocyclus ingens [%]                          | 0.00       | 0.00       | 0.00       | 0.00       | 0.00       | 0.00       | 0.00       | 0.00       | 0.00       | 0.00       | 0.00       |
| Cladogramma sp. [%]                              | 0.00       | 0.00       | 0.00       | 0.00       | 0.00       | 0.00       | 0.00       | 0.00       | 0.00       | 0.00       | 0.00       |
| Rouxia constricta [%]                            | 0.00       | 0.00       | 0.00       | 0.00       | 0.00       | 0.00       | 0.00       | 0.00       | 0.00       | 0.00       | 0.20       |
| Rouxia leventerae [%]                            | 0.00       | 0.00       | 0.00       | 0.00       | 0.00       | 0.00       | 0.00       | 0.00       | 0.00       | 0.00       | 0.00       |
| Unidentified taxa [%]                            | 0.16       | 0.00       | 0.16       | 0.22       | 0.63       | 0.20       | 0.45       | 0.00       | 0.36       | 0.92       | 0.00       |
| Chaetoceros resting spores [%]                   | 90.92      | 92.94      | 84.89      | 83.30      | 67.50      | 64.82      | 76.17      | 59.88      | 73.42      | 44.93      | 70.74      |
| Total [%]                                        | 100.00     | 100.00     | 100.00     | 100.00     | 100.00     | 100.00     | 100.00     | 100.00     | 100.00     | 100.00     | 100.00     |
| diatom counted                                   | 628        | 439        | 642        | 455        | 640        | 506        | 449        | 481        | 824        | 434        | 499        |
| Diatom concentration [valves/g]                  | 8.29E+07   | 2.69E+07   | 3.98E+07   | 2.35E+07   | 9.62E+07   | 1.64E+07   | 4.49E+07   | 1.00E+07   | 5.06E+07   | 1.01E+07   | 1.50E+07   |
| seasonal sea-ice assemblage [% without CRS]      | 43.27      | 30.54      | 34.81      | 40.17      | 31.90      | 43.17      | 23.49      | 25.97      | 47.91      | 10.69      | 17.00      |
| open ocean cold assemblage [% without CRS]       | 52.98      | 65.38      | 62.38      | 55.98      | 64.48      | 50.54      | 69.07      | 70.39      | 47.75      | 86.53      | 80.04      |
| open ocn warm assemblage [% without CRS]         | 0.66       | 0.90       | 0.70       | 1.50       | 1.58       | 4.34       | 4.88       | 1.94       | 2.34       | 1.58       | 1.19       |
| fossil species [% without CRS]                   | 0.00       | 0.00       | 0.00       | 0.00       | 0.00       | 0.00       | 0.00       | 0.00       | 0.00       | 0.00       | 0.20       |
| benthic and epiphytic assemblage [% without CRS] | 0.66       | 0.68       | 1.17       | 1.07       | 0.68       | 1.30       | 0.93       | 0.97       | 1.00       | 0.20       | 0.99       |
| Diatom concentration [valve/g without CRS]       | 6.73E+06   | 2.68E+06   | 8.84E+06   | 4.03E+06   | 3.37E+06   | 6.42E+06   | 2.15E+07   | 3.68E+06   | 1.23E+07   | 6.69E+06   | 3.80E+06   |

| Event                                            | PS97/072-1 | PS97/072-1 | PS97/072-1 | PS97/072-1 | PS97/072-1 | PS97/072-1 | PS97/072-1 | PS97/072-1 | PS97/072-1 | PS97/072-1 |
|--------------------------------------------------|------------|------------|------------|------------|------------|------------|------------|------------|------------|------------|
| Depth [m]                                        | 8.86       | 8.90       | 8.94       | 9.02       | 9.10       | 9.20       | 9.32       | 9.44       | 9.80       | 10.00      |
| Achnanthes brevipes [%]                          | 0.00       | 0.00       | 0.00       | 0.00       | 0.00       | 0.00       | 0.00       | 0.00       | 0.00       | 0.00       |
| Amphora copulata [%]                             | 0.00       | 0.00       | 0.00       | 0.00       | 0.00       | 0.00       | 0.00       | 0.00       | 0.00       | 0.00       |
| Amphora coffaeiformis [%]                        | 0.00       | 0.00       | 0.00       | 0.00       | 0.00       | 0.00       | 0.00       | 0.00       | 0.00       | 0.00       |
| Cocconeis costata [%]                            | 0.00       | 0.00       | 0.00       | 0.00       | 0.00       | 0.00       | 0.00       | 0.00       | 0.39       | 0.00       |
| Cocconeis dalmannii [%]                          | 0.00       | 0.00       | 0.00       | 0.00       | 0.00       | 0.00       | 0.00       | 0.00       | 0.00       | 0.00       |
| Cocconeis fasciolata [%]                         | 0.00       | 0.00       | 0.00       | 0.00       | 0.00       | 0.00       | 0.00       | 0.22       | 0.00       | 0.00       |
| Cocconeis californica var californica [%]        | 0.00       | 0.00       | 0.00       | 0.00       | 0.00       | 0.00       | 0.00       | 0.00       | 0.00       | 0.24       |
| Cocconeis californica var. kerguelensis [%]      | 0.00       | 0.00       | 0.00       | 0.00       | 0.00       | 0.00       | 0.16       | 0.00       | 0.00       | 0.00       |
| Cocconeis melchioroides [%]                      | 0.00       | 0.00       | 0.00       | 0.00       | 0.00       | 0.00       | 0.00       | 0.00       | 0.00       | 0.00       |
| Cocconeis imperatrix [%]                         | 0.00       | 0.00       | 0.00       | 0.00       | 0.00       | 0.00       | 0.00       | 0.00       | 0.00       | 0.00       |
| Cocconeis sp. 1 [%]                              | 0.00       | 0.00       | 0.00       | 0.00       | 0.00       | 0.00       | 0.00       | 0.00       | 0.00       | 0.00       |
| Cocconeis sp. 2 [%]                              | 0.00       | 0.00       | 0.00       | 0.00       | 0.00       | 0.00       | 0.00       | 0.00       | 0.00       | 0.00       |
| Entopilea ocellata [%]                           | 0.00       | 0.00       | 0.00       | 0.00       | 0.00       | 0.00       | 0.00       | 0.00       | 0.00       | 0.00       |
| Fallacia marnieri [%]                            | 0.00       | 0.00       | 0.00       | 0.00       | 0.00       | 0.00       | 0.00       | 0.00       | 0.00       | 0.00       |
| Gomphonopsis littoralis [%]                      | 0.00       | 0.00       | 0.00       | 0.00       | 0.00       | 0.00       | 0.00       | 0.00       | 0.00       | 0.00       |
| Grammatophora angulosa [%]                       | 0.00       | 0.00       | 0.00       | 0.00       | 0.00       | 0.00       | 0.00       | 0.00       | 0.00       | 0.00       |
| Licmophora gracilis [%]                          | 0.00       | 0.00       | 0.00       | 0.00       | 0.00       | 0.00       | 0.00       | 0.00       | 0.00       | 0.00       |
| Melosira adeliae [%]                             | 0.00       | 0.00       | 0.00       | 0.00       | 0.00       | 0.00       | 0.00       | 0.00       | 0.00       | 0.00       |
| Navicula directa [%]                             | 0.00       | 0.00       | 0.00       | 0.00       | 0.00       | 0.36       | 0.16       | 0.44       | 0.39       | 1.94       |
| Navicula glaciei [%]                             | 0.00       | 0.00       | 0.00       | 0.00       | 0.00       | 0.00       | 0.00       | 0.00       | 0.00       | 0.24       |
| Navicula imperfecta [%]                          | 0.00       | 0.00       | 0.00       | 0.00       | 0.00       | 0.00       | 0.00       | 0.00       | 0.00       | 0.24       |
| Navicula perminuta [%]                           | 0.00       | 0.00       | 0.00       | 0.00       | 0.00       | 0.00       | 0.00       | 0.00       | 0.00       | 0.00       |
| Paralia sulcata [%]                              | 0.00       | 0.00       | 0.00       | 0.00       | 0.00       | 0.00       | 0.00       | 0.22       | 1.18       | 0.24       |
| Pianothidium vicentii [%]                        | 0.00       | 0.00       | 0.00       | 0.00       | 0.00       | 0.00       | 0.00       | 0.00       | 0.00       | 0.00       |
| Pseudogomphonema kantschaticum [%]               | 0.00       | 0.00       | 0.00       | 0.00       | 0.00       | 0.00       | 0.00       | 0.00       | 0.00       | 0.00       |
| Actinocyclus actinocylus [%]                     | 0.00       | 0.48       | 0.63       | 0.00       | 0.42       | 0.91       | 1.91       | 2.19       | 2.35       | 0.00       |
| Berkeleya spp. [%]                               | 0.00       | 0.00       | 0.00       | 0.00       | 0.00       | 0.00       | 0.00       | 0.00       | 0.00       | 0.24       |
| Corethron pennatum [%]                           | 0.00       | 0.00       | 0.00       | 0.00       | 0.00       | 0.55       | 0.32       | 0.22       | 0.00       | 0.00       |
| Eucampia antarctica var. recta [%]               | 0.00       | 0.00       | 0.00       | 0.00       | 0.00       | 0.00       | 0.64       | 0.66       | 0.39       | 0.49       |
| Fragilariopsis curta [%]                         | 0.17       | 0.72       | 0.31       | 0.88       | 1.17       | 1.82       | 5.57       | 7.02       | 1.96       | 14.08      |
| Fragilariopsis cylindrus [%]                     | 0.00       | 0.00       | 0.00       | 0.35       | 0.32       | 0.18       | 1.59       | 0.44       | 0.39       | 0.00       |
| Fragilariopsis nana [%]                          | 0.00       | 0.00       | 0.00       | 0.00       | 0.00       | 0.00       | 0.00       | 0.00       | 0.00       | 0.00       |
| Fragilariopsis obliquecostata [%]                | 0.52       | 0.00       | 0.31       | 0.35       | 0.11       | 0.73       | 0.80       | 2.41       | 0.39       | 1.46       |
| Fragilariopsis peragallii [%]                    | 0.00       | 0.00       | 0.00       | 0.00       | 0.00       | 0.18       | 0.32       | 0.00       | 0.00       | 0.24       |
| Fragilariopsis rhombica [%]                      | 0.00       | 0.00       | 0.16       | 0.35       | 0.00       | 0.18       | 1.11       | 0.88       | 0.39       | 0.00       |
| Fragilariopsis ritscheri [%]                     | 0.17       | 0.00       | 0.16       | 0.35       | 0.11       | 0.18       | 1.43       | 2.41       | 0.00       | 0.24       |
| Fragilariopsis sublinearis [%]                   | 0.00       | 0.00       | 0.00       | 0.00       | 0.21       | 0.55       | 0.96       | 2.41       | 1.18       | 2.18       |
| Fragilariopsis sublin/obliq [%]                  | 0.00       | 0.00       | 0.00       | 0.00       | 0.00       | 0.00       | 0.00       | 0.00       | 0.00       | 0.00       |
| Fragilariopsis vanheurckii [%]                   | 0.35       | 0.00       | 0.00       | 1.23       | 0.32       | 0.36       | 1.75       | 1.75       | 0.39       | 3.40       |
| Neodenticula seminae [%]                         | 0.00       | 0.00       | 0.31       | 0.00       | 0.32       | 0.00       | 0.00       | 0.22       | 4.31       | 0.24       |
| Nitzschia stellata [%]                           | 0.00       | 0.00       | 0.00       | 0.00       | 0.00       | 0.00       | 0.00       | 0.00       | 0.00       | 0.00       |
| N. taeniiiformis [%]                             | 0.00       | 0.00       | 0.00       | 0.00       | 0.00       | 0.00       | 0.00       | 0.00       | 0.00       | 1.21       |
| Odontella weissflogii [%]                        | 0.00       | 0.00       | 0.00       | 0.00       | 0.11       | 0.00       | 0.96       | 0.88       | 0.00       | 0.24       |
| Porosira glacialis [%]                           | 0.00       | 0.00       | 0.00       | 0.00       | 0.00       | 0.00       | 0.00       | 0.00       | 0.00       | 0.49       |
| Porosira pseudodenticulata [%]                   | 0.17       | 0.24       | 0.16       | 0.00       | 0.11       | 0.00       | 0.48       | 0.22       | 0.00       | 1.46       |
| Porosira spp. [%]                                | 0.00       | 0.00       | 0.00       | 0.00       | 0.21       | 0.55       | 0.96       | 1.10       | 2.35       | 0.00       |
| Stellarima microtrias (rs and veg) [%]           | 0.17       | 0.48       | 0.47       | 0.35       | 0.11       | 0.36       | 1.75       | 1.10       | 3.53       | 0.00       |
| Synedropsis laevis [%]                           | 0.00       | 0.00       | 0.00       | 0.00       | 0.00       | 0.00       | 0.00       | 0.00       | 0.00       | 2.91       |
| Synedropsis recta [%]                            | 0.00       | 0.00       | 0.00       | 0.00       | 0.00       | 0.00       | 0.00       | 0.22       | 0.39       | 1.94       |
| Synedra/Synedropsis spp. [%]                     | 0.00       | 0.00       | 0.00       | 0.00       | 0.00       | 0.00       | 0.00       | 0.00       | 0.00       | 0.00       |
| Synedropsis sp. [%]                              | 0.00       | 0.00       | 0.16       | 0.00       | 0.00       | 0.00       | 0.00       | 0.00       | 0.39       | 0.00       |
| Thalassiosira antarctica (T1=cold) [%]           | 0.87       | 0.24       | 0.94       | 0.18       | 0.85       | 1.64       | 7.64       | 9.87       | 5.49       | 0.73       |
| Asteromphalus hookeri [%]                        | 0.00       | 0.00       | 0.00       | 0.00       | 0.00       | 0.00       | 0.00       | 0.00       | 0.00       | 0.24       |
| Asteromphalus hyalinus [%]                       | 0.00       | 0.00       | 0.00       | 0.00       | 0.00       | 0.00       | 0.00       | 0.00       | 0.00       | 0.00       |
| Eucampia antarctica var. antarctica [%]          | 0.00       | 0.00       | 0.00       | 0.00       | 0.00       | 0.00       | 0.00       | 0.00       | 0.39       | 0.00       |
| Fragilariopsis pseudonana [%]                    | 0.00       | 0.00       | 0.00       | 0.18       | 0.00       | 0.00       | 0.00       | 0.00       | 0.00       | 0.00       |
| Fragilariopsis separanda [%]                     | 0.00       | 0.00       | 0.00       | 0.00       | 0.00       | 0.00       | 0.00       | 0.00       | 0.00       | 0.00       |
| Proboscia inermis (winter) [%]                   | 0.00       | 0.00       | 0.00       | 0.00       | 0.21       | 0.00       | 0.00       | 0.00       | 0.00       | 0.24       |
| Proboscia inermis (spring) [%]                   | 0.00       | 0.00       | 0.00       | 0.00       | 0.00       | 0.18       | 0.64       | 0.00       | 0.39       | 0.00       |
| Proboscia alata [%]                              | 0.00       | 0.00       | 0.00       | 0.00       | 0.21       | 0.00       | 0.00       | 0.44       | 0.00       | 0.49       |
| Proboscia spp. [%]                               | 0.00       | 0.00       | 0.00       | 0.00       | 0.00       | 0.00       | 0.00       | 0.00       | 0.00       | 0.00       |
| Pseudo-nitzschia turgiduloides [%]               | 0.00       | 0.00       | 0.00       | 0.00       | 0.00       | 0.00       | 0.00       | 0.00       | 0.00       | 0.73       |
| Rhizosolenia antennata f. antennata [%]          | 0.00       | 0.00       | 0.00       | 0.00       | 0.00       | 0.00       | 0.00       | 0.00       | 0.00       | 0.00       |
| R. antennata f. semispina [%]                    | 0.00       | 0.00       | 0.00       | 0.00       | 0.11       | 0.00       | 0.16       | 0.22       | 8.24       | 0.00       |
| R. polydactyla f. polydactyla [%]                | 0.00       | 0.00       | 0.00       | 0.00       | 0.00       | 0.00       | 0.00       | 0.00       | 0.00       | 0.00       |
| R. simplex [%]                                   | 0.17       | 0.00       | 0.31       | 0.00       | 0.00       | 0.00       | 0.00       | 0.00       | 1.57       | 0.24       |
| Shionodiscus gracilis var. expectus [%]          | 0.17       | 0.00       | 0.16       | 0.35       | 0.21       | 0.00       | 0.00       | 0.88       | 0.00       | 0.00       |
| Shionodiscus gracilis var. gracilis [%]          | 0.17       | 0.00       | 0.16       | 0.18       | 0.11       | 0.55       | 1.27       | 1.10       | 0.00       | 0.00       |
| Shionodiscus frenguelliopsis [%]                 | 0.00       | 0.00       | 0.00       | 0.11       | 0.18       | 0.00       | 1.10       | 0.00       | 0.00       | 0.24       |
| Thalassiosira antarctica (veg+RS) [%]            | 6.45       | 17.83      | 20.31      | 8.23       | 8.49       | 10.20      | 30.10      | 16.45      | 8.24       | 7.28       |
| Thalassiosira gravida [%]                        | 0.00       | 0.00       | 0.00       | 0.00       | 0.00       | 0.00       | 0.00       | 0.00       | 0.78       | 0.00       |
| Thalassiosira lentiginosa [%]                    | 0.00       | 0.24       | 0.00       | 0.00       | 0.00       | 0.00       | 0.16       | 1.10       | 2.35       | 0.24       |
| Thalassiosira maculata [%]                       | 0.00       | 0.00       | 0.00       | 0.00       | 0.00       | 0.00       | 0.00       | 0.00       | 0.00       | 0.00       |
| Thalassiosira oliverana [%]                      | 0.00       | 0.00       | 0.00       | 0.00       | 0.00       | 0.00       | 0.16       | 0.00       | 0.39       | 0.00       |
| Thalassiosira ritscheri [%]                      | 0.00       | 0.00       | 0.00       | 0.00       | 0.00       | 0.00       | 0.00       | 0.00       | 0.39       | 0.00       |
| Thalassiosira scotia [%]                         | 0.35       | 0.00       | 0.00       | 0.00       | 0.11       | 1.09       | 6.85       | 1.97       | 0.00       | 0.00       |
| Thalassiosira antarctica/scotia [%]              | 3.83       | 0.00       | 0.00       | 0.35       | 0.42       | 0.73       | 8.60       | 4.82       | 1.18       | 0.00       |
| Thalassiosira tumida [%]                         | 0.17       | 0.00       | 0.00       | 0.00       | 0.32       | 0.55       | 0.64       | 0.66       | 0.00       | 0.24       |
| Thalassiothrix antarctica [%]                    | 0.00       | 0.00       | 0.00       | 0.00       | 0.00       | 0.00       | 0.00       | 0.00       | 0.00       | 0.00       |
| Trichotoxon reinboldii [%]                       | 0.00       | 0.00       | 0.00       | 0.00       | 0.11       | 0.18       | 0.16       | 0.22       | 3.14       | 0.49       |
| Azpeitia tabularis [%]                           | 0.00       | 0.00       | 0.00       | 0.00       | 0.00       | 0.00       | 0.00       | 0.00       | 0.00       | 0.00       |
| Coscinodiscus acculus-irridis [%]                | 0.00       | 0.00       | 0.00       | 0.00       | 0.00       | 0.00       | 0.00       | 0.44       | 0.39       | 0.00       |
| Fragilariopsis kerguelensis [%]                  | 0.17       | 0.24       | 0.00       | 0.53       | 0.11       | 0.18       | 0.64       | 2.41       | 0.78       | 0.73       |
| Nitzschia bicapitata [%]                         | 0.00       | 0.00       | 0.00       | 0.00       | 0.00       | 0.00       | 0.00       | 0.00       | 0.00       | 0.00       |
| Shionodiscus oestrupii [%]                       | 0.00       | 0.00       | 0.00       | 0.00       | 0.00       | 0.00       | 0.48       | 0.22       | 0.00       | 0.00       |
| Stephanopyxis turris [%]                         | 0.00       | 0.00       | 0.00       | 0.00       | 0.00       | 0.00       | 0.00       | 0.00       | 0.00       | 0.00       |
| Actinocyclus ingens [%]                          | 0.00       | 0.00       | 0.00       | 0.00       | 0.00       | 0.00       | 0.00       | 0.44       | 3.14       | 0.00       |
| Cladogramma sp. [%]                              | 0.00       | 0.00       | 0.00       | 0.00       | 0.00       | 0.00       | 0.00       | 0.00       | 0.00       | 0.00       |
| Rouxia constricta [%]                            | 0.00       | 0.00       | 0.00       | 0.00       | 0.00       | 0.00       | 0.00       | 0.22       | 2.35       | 0.00       |
| Rouxia leventerae [%]                            | 0.00       | 0.00       | 0.00       | 0.00       | 0.00       | 0.00       | 0.00       | 0.00       | 0.78       | 1.21       |
| Unidentified taxa [%]                            | 0.17       | 0.00       | 0.16       | 0.00       | 0.21       | 0.36       | 0.80       | 2.85       | 7.45       | 2.67       |
| Chaetoceros resting spores [%]                   | 85.89      | 79.52      | 75.28      | 86.16      | 84.93      | 77.23      | 20.86      | 29.61      | 32.16      | 50.49      |
| Total [%]                                        | 100.00     | 100.00     | 100.00     | 100.00     | 100.00     | 100.00     | 100.00     | 100.00     | 100.00     | 100.00     |
| diatom counted                                   | 574        | 415        | 635        | 570        | 941        | 549        | 628        | 456        | 512        | 412        |
| Diatom concentration [valves/g]                  | 3.23E+07   | 1.97E+07   | 1.86E+07   | 7.77E+07   | 5.65E+07   | 3.58E+07   | 9.79E+06   | 1.47E+07   | 8.01E+05   | 1.43E+06   |
| seasonal sea-ice assemblage [% without CRS]      | 14.96      | 13.17      | 12.96      | 30.08      | 28.89      | 31.77      | 35.61      | 47.95      | 34.30      | 73.35      |
| open ocean cold assemblage [% without CRS]       | 81.50      | 84.67      | 85.43      | 64.34      | 68.65      | 64.10      | 61.57      | 40.82      | 40.12      | 13.01      |
| open ocean warm assemblage [% without CRS]       | 2.36       | 1.30       | 1.01       | 3.72       | 0.61       | 1.32       | 1.41       | 4.10       | 1.74       | 2.56       |
| fossil species [% without CRS]                   | 0.20       | 0.00       | 0.00       | 0.16       | 0.00       | 0.00       | 0.00       | 0.86       | 9.30       | 1.28       |
| benthic and epiphytic assemblage [% without CRS] | 0.20       | 0.00       | 0.00       | 0.62       | 0.20       | 0.75       | 0.40       | 1.51       | 3.49       | 4.90       |
| Diatom concentration [valve/g without CRS]       | 3.93E+06   | 3.08E+06   | 4.84E+06   | 9.90E+06   | 7.33E+06   | 4.71E+06   | 7.75E+06   | 8.97E+06   | 5.38E+05   | 8.61E+05   |

Not clear in the text or here, which species are included in each of the groups.

## References

- Massé, G., Belt, S.T., Crosta, X., Schmidt, S., Snape, I., Thomas, D.N., Rowland, S.J., 2011. Highly branched isoprenoids as proxies for variable sea ice conditions in the Southern Ocean. *Antarctic Science* 23, 487–498. doi:10.1017/S0954102011000381
- Sinninghe Damsté, J.S., Rijpstra, W.I.C., Coolen, M.J.L., Schouten, S., Volkman, J.K., 2007. Rapid sulfurisation of highly branched isoprenoid (HBI) alkenes in sulfidic Holocene sediments from Ellis Fjord, Antarctica. *Organic Geochemistry* 38, 128–139. doi:10.1016/j.orggeochem.2006.08.003
- Vorrath, M.-E., Müller, J., Rebolledo, L., Cárdenas, P., Shi, X., Esper, O., Opel, T., Geibert, W., Muñoz, P., Haas, C., Kuhn, G., Lange, C.B., Lohmann, G., Mollenhauer, G., 2020. Sea ice dynamics in the Bransfield Strait, Antarctic Peninsula, during the past 240 years: a multi-proxy intercomparison study. *Climate of the Past* 16, 2459–2483. doi:10.5194/cp-16-2459-2020
